# Supplementary material for: Chemogenetic Tags with Probe Exchange for Live-Cell Fluorescence Microscopy
Source: PubMed Central journal article supplement — ACS Chem Biol. 2021 Apr 29;16(5):891–904. doi: 10.1021/acschembio.1c00100 (PMC8154248; doi:10.1021/acschembio.1c00100), 2021-04-29
Supplement: cb1c00100_si_001.pdf [file cb1c00100_si_001.pdf]

## Supplementary Information

# Chemogenetic Tags with Probe Exchange for Live-Cell Fluorescence Microscopy

Aditya Iyer<sup>§\*</sup>, Maxim Baranov<sup>‡</sup>, Alexander J Foster<sup>§</sup>, Shreyans Chordia<sup>||</sup>, Gerard  
Roelfes<sup>||</sup>, Rifka Vlijm<sup>‡</sup>, Geert van den Bogaart<sup>‡</sup>, Bert Poolman<sup>§\*</sup>

<sup>§</sup>Department of Biochemistry, Groningen Biomolecular Sciences and Biotechnology  
Institute, University of Groningen, Nijenborgh 4, 9747 AG Groningen, The  
Netherlands

<sup>‡</sup>Molecular Biophysics, Zernike Institute for Advanced Materials, University of  
Groningen, Nijenborgh 4, 9747 AG Groningen, The Netherlands

<sup>‡</sup>Department of Molecular Immunology, Groningen Biomolecular Sciences and  
Biotechnology Institute, University of Groningen, Nijenborgh 7, 9747 AG Groningen,  
the Netherlands

<sup>||</sup>Stratingh Institute for Chemistry, University of Groningen, Nijenborgh 4, 9747 AG  
Groningen, The Netherlands

\*Email for correspondence: a.s.iyer@rug.nl; b.poolman@rug.nl

### This PDF file includes:

Figures S1 to S26

Tables S1 to S3

Appendix 1: DNA sequences (5' to 3') of constructs used in the study

Appendix 2. Gating strategy for flow cytometry studies

Appendix 3. Sources and nomenclature of dyes

SI References

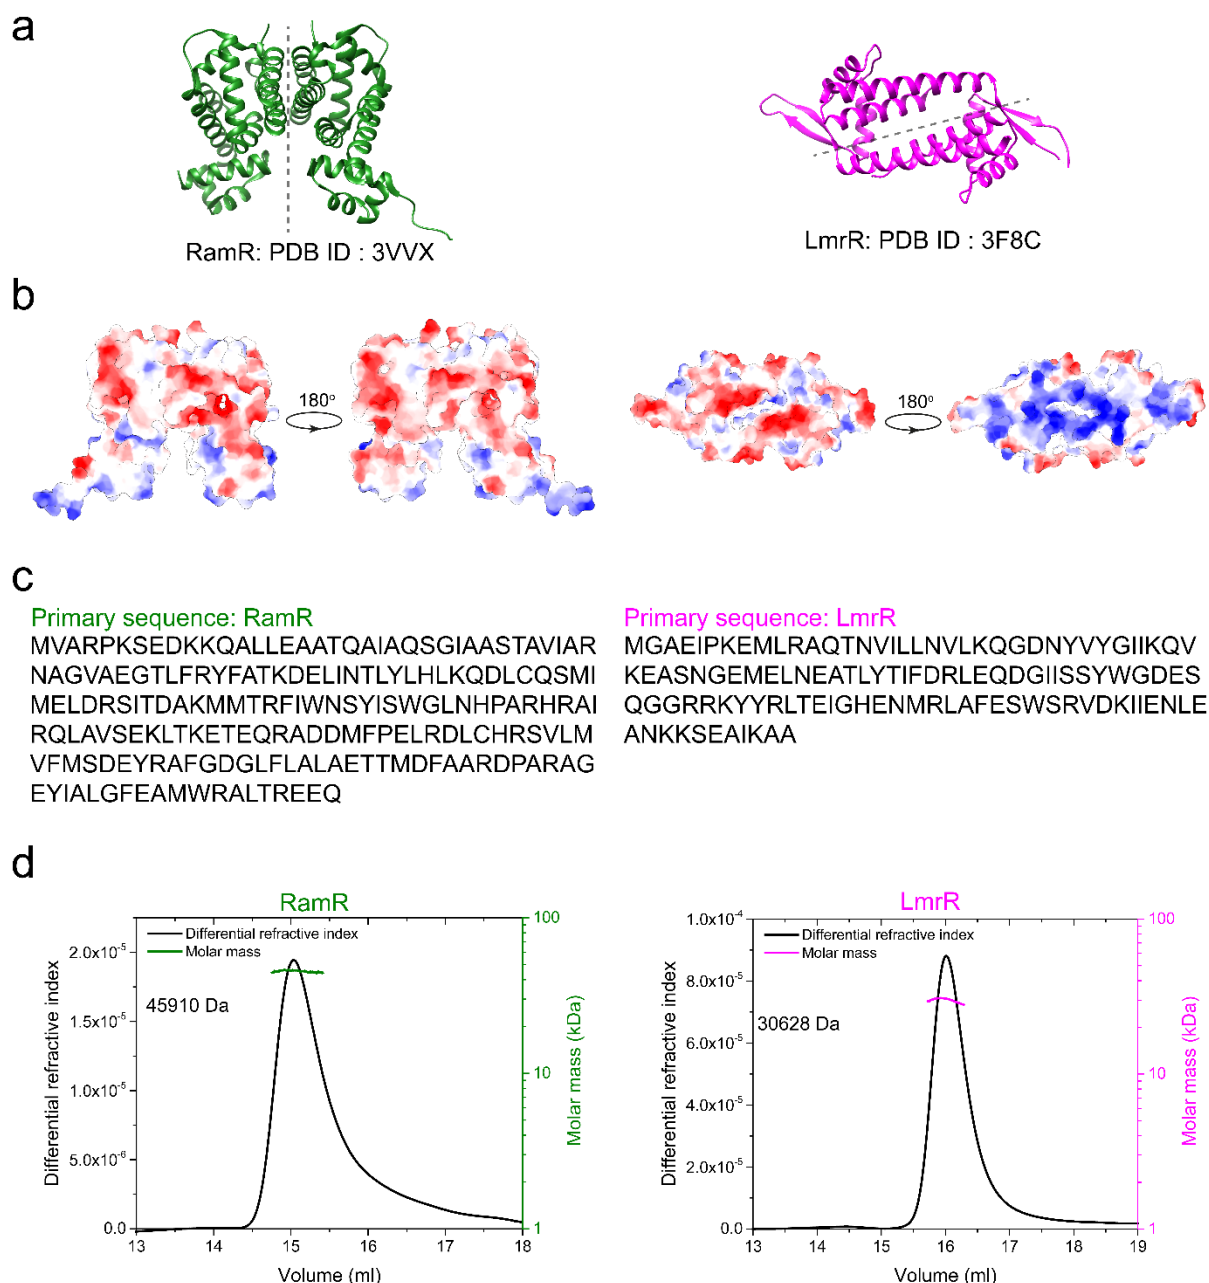

**Fig. S1.** (a) Protein structures by x-ray crystallography of transcription factor-based chemogenetic CTPEs: RamR and LmrR. (b) Coulombic surface mapping of the electrostatic potential of CTPEs depicted red for negative potential, white near neutral, and blue for positive potential. (c) The primary sequences of the CTPEs used in the study. (d) Size-exclusion chromatography coupled the multi-angle light scattering (SEC-MALS) analysis of CTPEs to determine the native molecular weight of the proteins. Black lines, signals from the refractive index detector (left-hand Y-axis); solid colored lines, calculated protein molecular weights (right-hand Y-axis). RamR (green) and LmrR (magenta) were observed to have a molecular weight of ~45.9 kDa and ~30.6 kDa, respectively, which correspond to dimeric structures. All experiments were performed at 30 °C in 20 mM K-MOPS, 150 mM NaCl buffered at pH 7.0.

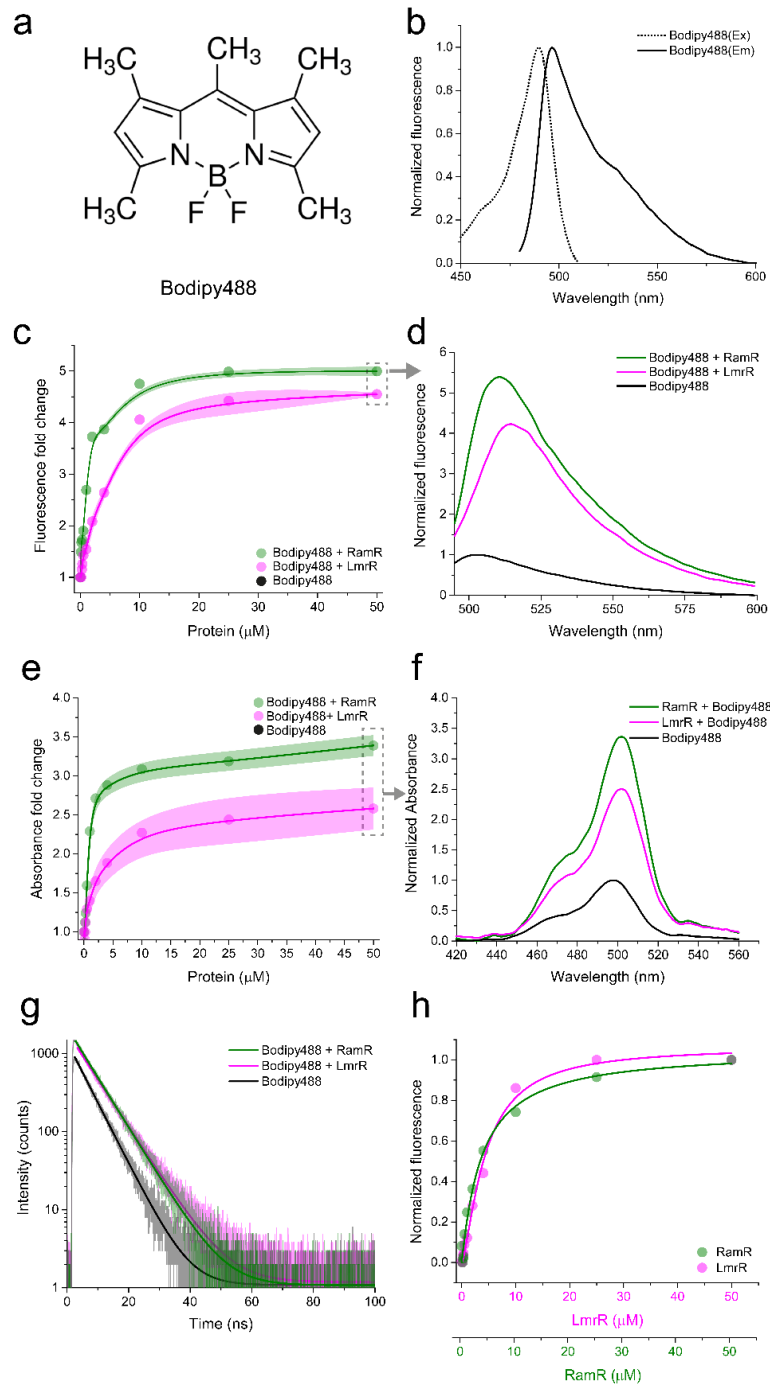

**Fig. S2.** Characterization of CTPEs (RamR: green and LmrR: magenta) with Bodipy488. (a) Structure of Bodipy488. (b) Excitation (dotted line) and emission (solid line) spectra of Bodipy488. (c) Fluorescence fold change of Bodipy488 on titration with CTPEs. (d) Fluorescence emission spectra of Bodipy488 with CTPEs at a protein:dye molar ratio of 50:1. (e) Absorbance fold-change of Bodipy488 on titration with CTPEs. Solid lines represent spline fits, and shaded regions represent s.d. over three independent measurements in panel (c) and (e). (f) Absorption spectra of Bodipy488 with CTPEs at a protein:dye molar ratio of 50:1. (g) Fluorescence lifetime spectra of Bodipy488 with CTPEs at a protein:dye molar ratio of 50:1 fit with a mono-exponential decay function (solid lines). (h) Bound fraction of Bodipy488 with CTPEs ascertained from a Hill fit. All experiments were performed at 30 °C in 20 mM K-MOPS, 150 mM NaCl buffered at pH 7.0.

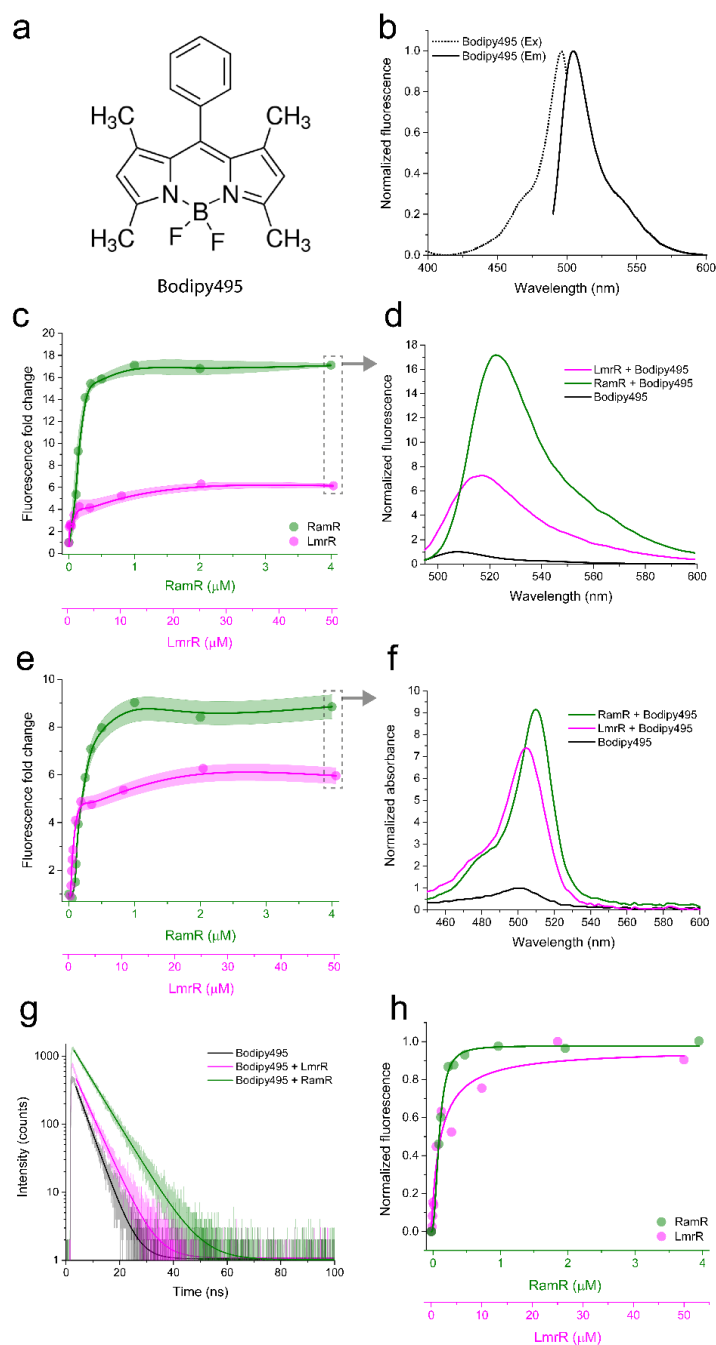

**Fig. S3.** Characterization of CTPEs (RamR: green and LmrR: magenta) with Bodipy495. (a) Structure of Bodipy495. (b) Excitation (dotted line) and emission (solid line) spectra of Bodipy495. (c) Fluorescence fold change of Bodipy495 on titration with CTPEs. (d) Fluorescence emission spectra of Bodipy495 with RamR and LmrR at a protein:dye molar ratio of 4:1 and 50:1, respectively. (e) Absorbance fold-change of Bodipy495 on titration with CTPEs. Solid lines represent spline fits, and shaded regions represent s.d. over three independent measurements in panel (c) and (e). (f) Absorption spectra of Bodipy495 with RamR and LmrR at a protein:dye molar ratio of 4:1 and 50:1, respectively. (g) Fluorescence lifetime spectra of Bodipy495 with RamR and LmrR at a protein:dye molar ratio of 4:1 and 50:1 respectively fit with a mono-exponential decay function (solid lines). (h) Bound fraction of Bodipy495 with CTPEs ascertained from a Hill fit. All experiments were performed at 30 °C in 20 mM K-MOPS, 150 mM NaCl buffered at pH 7.0.

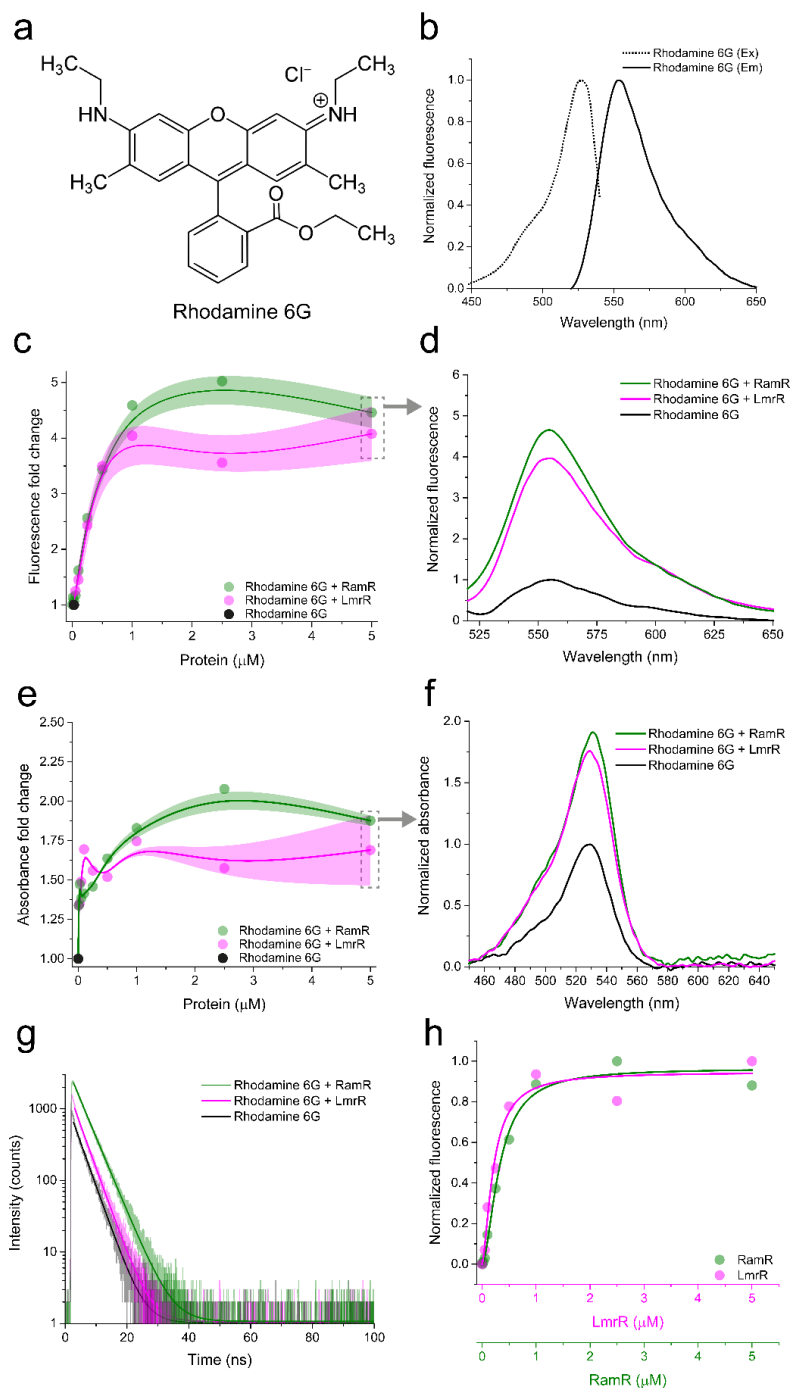

**Fig. S4.** Characterization of CTPEs (RamR: green and LmrR: magenta) with Rhodamine 6G. (a) Structure of Rhodamine 6G. (b) Excitation (dotted line) and emission (solid line) spectra of Rhodamine 6G. (c) Fluorescence fold change of Rhodamine 6G on titration with CTPEs. (d) Fluorescence emission spectra of Rhodamine 6G with CTPEs at a protein:dye molar ratio of 5:1. (e) Absorbance fold-change of Rhodamine 6G on titration with CTPEs. Solid lines represent spline fits, and shaded regions represent s.d. over three independent measurements in panel (c) and (e). (f) Absorption spectra of Rhodamine 6G with CTPEs at a protein:dye molar ratio of 5:1. (g) Fluorescence lifetime spectra of Rhodamine 6G with CTPEs at a protein:dye molar ratio of 5:1 fit with a mono-exponential decay function (solid lines). (h) Bound fraction of Rhodamine 6G with CTPEs ascertained from a Hill fit. All experiments were performed at 30 °C in 20 mM K-MOPS, 150 mM NaCl buffered at pH 7.0.

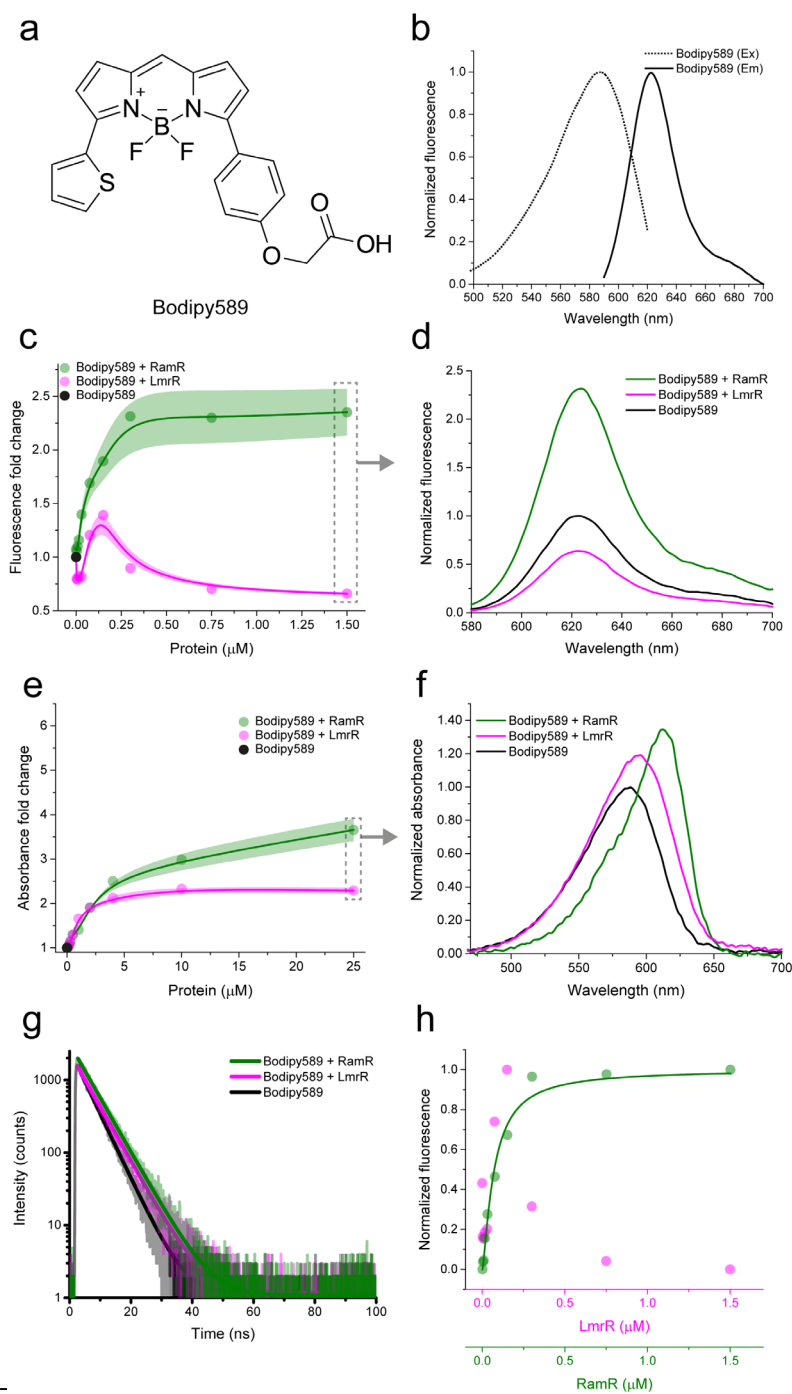

**Fig. S5.** Characterization of CTPEs (RamR: green and LmrR: magenta) with Bodipy589. (a) Structure of Bodipy589. (b) Excitation (dotted line) and emission (solid line) spectra of Bodipy589. (c) Fluorescence fold change of Bodipy589 on titration with CTPEs. (d) Fluorescence emission spectra of Bodipy589 with CTPEs at a protein:dye molar ratio of 1.5:1. (e) Absorbance fold-change of Bodipy589 on titration with CTPEs. Solid lines represent spline fits, and shaded regions represent s.d. over three independent measurements in panel (c) and (e). (f) Absorption spectra of Bodipy589 with CTPEs at a protein:dye molar ratio of 1.5:1. (g) Fluorescence lifetime spectra of Bodipy589 with CTPEs at a protein:dye molar ratio of 1.5:1 fit with a mono-exponential decay function (solid lines). (h) Bound fraction of Bodipy589 with CTPEs ascertained from a Hill fit. All experiments were performed at 30 °C in 20 mM K-MOPS, 150 mM NaCl buffered at pH 7.0.

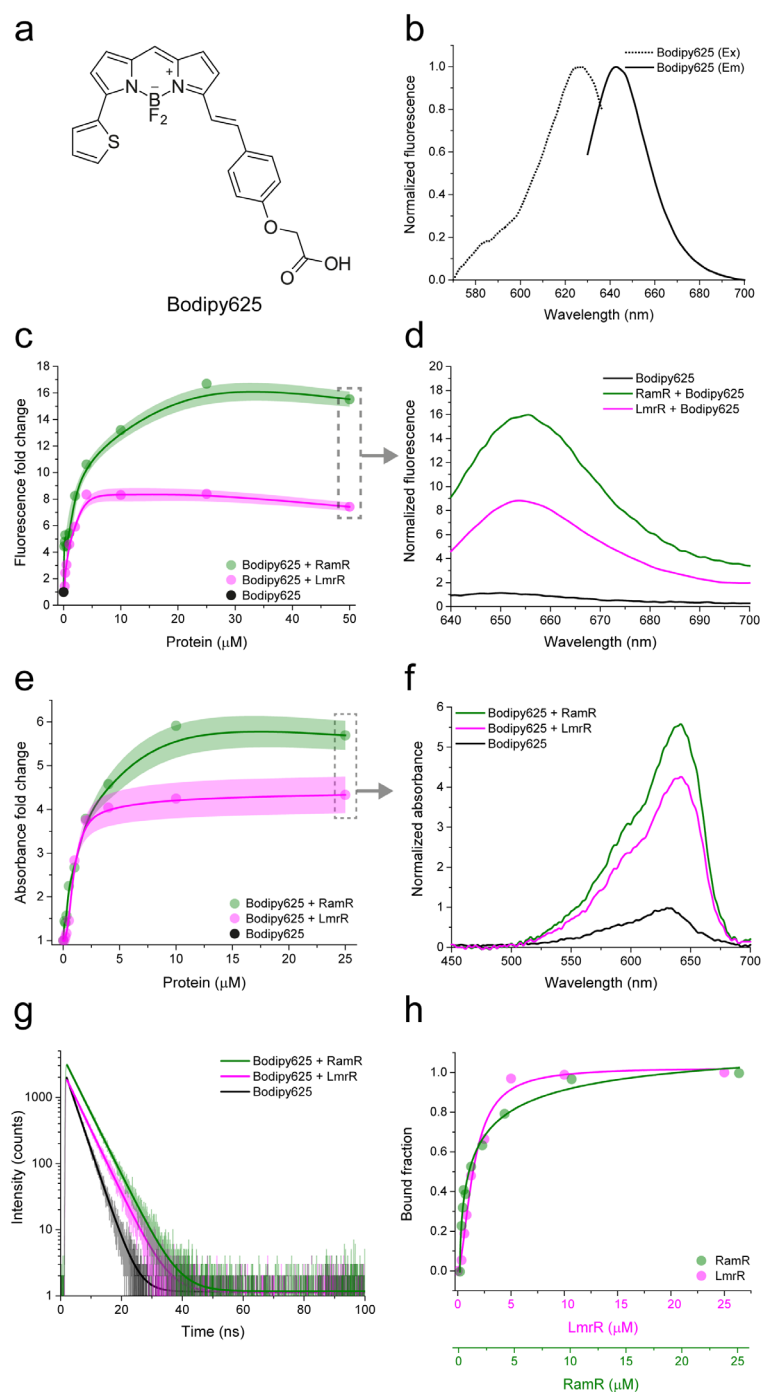

**Fig. S6.** Characterization of CTPEs (RamR: green and LmrR: magenta) with Bodipy625. (a) Structure of Bodipy625. (b) Excitation (dotted line) and emission (solid line) spectra of Bodipy625. (c) Fluorescence fold change of Bodipy625 on titration with CTPEs. (d) Fluorescence emission spectra of Bodipy625 with CTPEs at a protein:dye molar ratio of 50:1. (e) Absorbance fold-change of Bodipy625 on titration with CTPEs. Solid lines represent spline fits, and shaded regions represent s.d. over three independent measurements in panel (c) and (e). (f) Absorption spectra of Bodipy625 with CTPEs at a protein:dye molar ratio of 25:1. (g) Fluorescence lifetime spectra of Bodipy625 with CTPEs at a protein:dye molar ratio of 25:1 fit with a mono-exponential decay function (solid lines). (h) Bound fraction of Bodipy625 with CTPEs ascertained from a Hill fit. All experiments were performed at 30 °C in 20 mM K-MOPS, 150 mM NaCl buffered at pH 7.0.

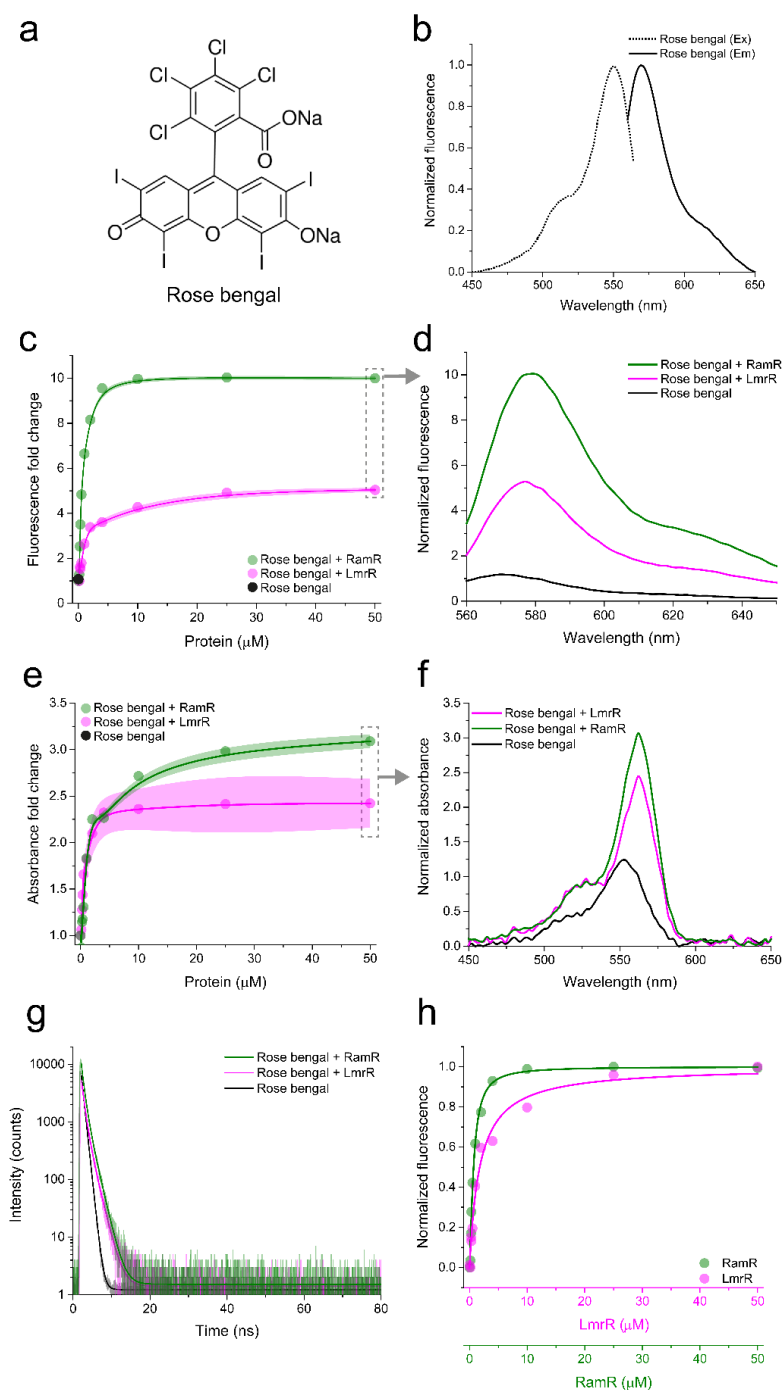

**Fig. S7.** Characterization of CTPEs (RamR: green and LmrR: magenta) with Rose bengal. (a) Structure of Rose bengal. (b) Excitation (dotted line) and emission (solid line) spectra of Rose bengal. (c) Fluorescence fold change of Rose bengal on titration with CTPEs. (d) Fluorescence emission spectra of Rose bengal with CTPEs at a protein:dye molar ratio of 50:1. (e) Absorbance fold-change of Rose bengal on titration with CTPEs. Solid lines represent spline fits, and shaded regions represent s.d. over three independent measurements in panel (c) and (e). (f) Absorption spectra of Rose bengal with CTPEs at a protein:dye molar ratio of 50:1. (g) Fluorescence lifetime spectra of Rose bengal with CTPEs at a protein:dye molar ratio of 50:1 fit with a mono-exponential decay function (solid lines). (h) Bound fraction of Rose bengal with CTPEs ascertained from a Hill fit. All experiments were performed at 30 °C in 20 mM K-MOPS, 150 mM NaCl buffered at pH 7.0.



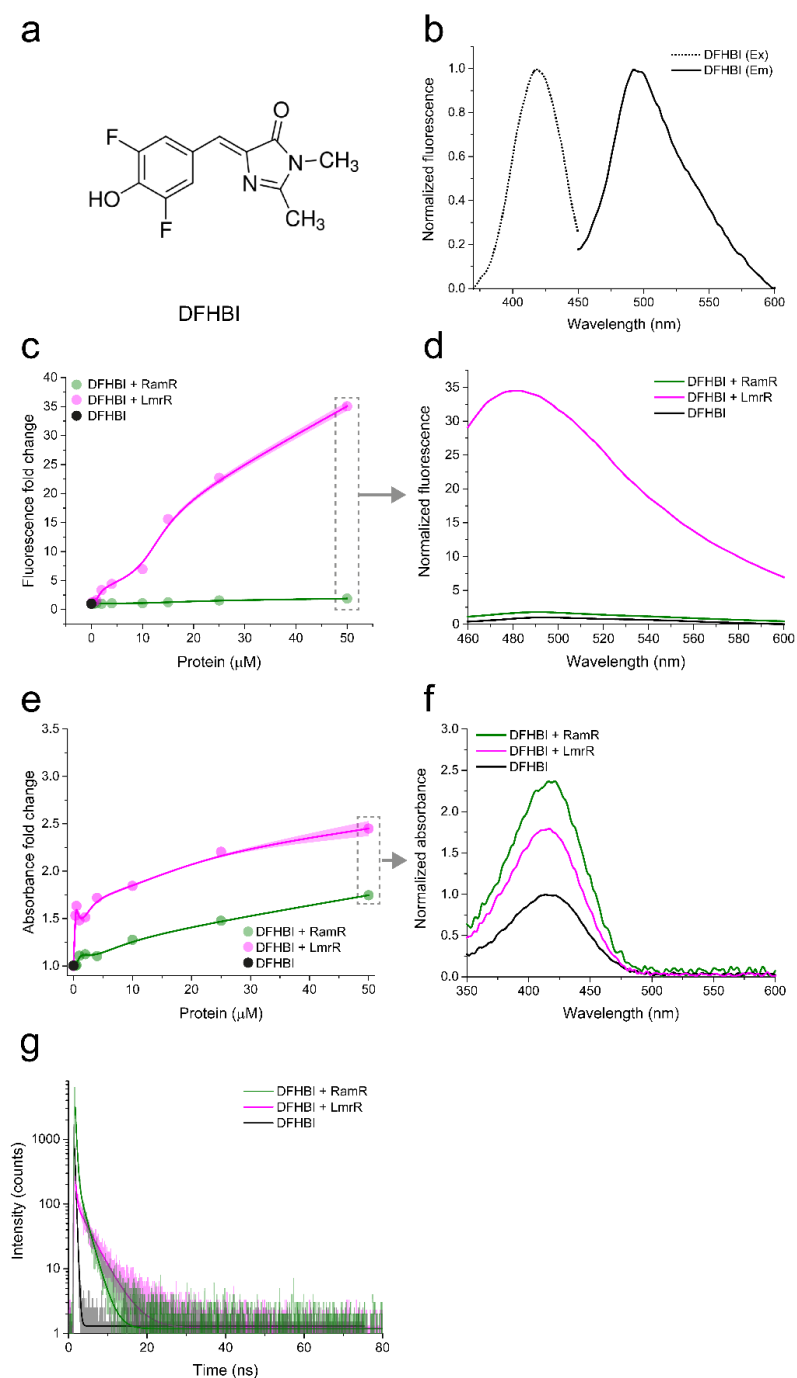

**Fig. S8.** Characterization of CTPEs (RamR: green and LmrR: magenta) with DFHBI. (a) Structure of DFHBI. (b) Excitation (dotted line) and emission (solid line) spectra of DFHBI. (c) Fluorescence fold change of DFHBI on titration with CTPEs. (d) Fluorescence emission spectra of DFHBI with CTPEs at a protein:dye molar ratio of 50:1. (e) Absorbance fold-change of DFHBI on titration with CTPEs. Solid lines represent spline fits, and shaded regions represent s.d. over three independent measurements in panel (c) and (e). (f) Absorption spectra of DFHBI with CTPEs at a protein:dye molar ratio of 50:1. (g) Fluorescence lifetime spectra of DFHBI with CTPEs at a protein:dye molar ratio of 50:1 fit with a bi-exponential decay function (solid lines). All experiments were performed at 30 °C in 20 mM K-MOPS, 150 mM NaCl buffered at pH 7.0.

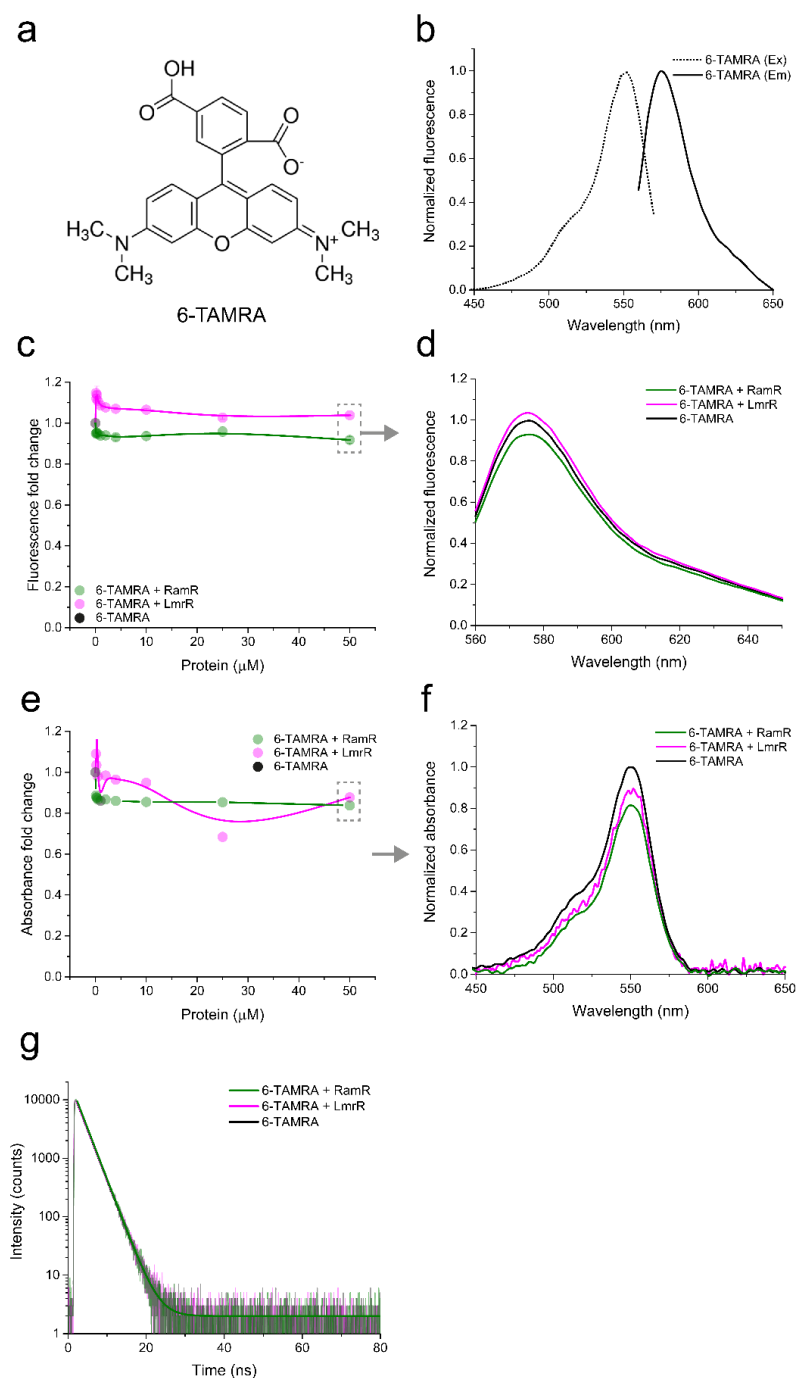

**Fig. S9.** Characterization of CTPEs (RamR: green and LmrR: magenta) with 6-TAMRA. (a) Structure of 6-TAMRA. (b) Excitation (dotted line) and emission (solid line) spectra of 6-TAMRA. (c) Fluorescence fold change of 6-TAMRA on titration with CTPEs. (d) Fluorescence emission spectra of 6-TAMRA with CTPEs at a protein:dye molar ratio of 50:1. (e) Absorbance fold change of 6-TAMRA on titration with CTPEs. Solid lines represent spline fits, and shaded regions represent s.d. over three independent measurements in panel (c) and (e). (f) Absorption spectra of 6-TAMRA with CTPEs at a protein:dye molar ratio of 50:1. (g) Fluorescence lifetime spectra of 6-TAMRA with CTPEs at a protein:dye molar ratio of 50:1 fit with a mono-exponential decay function (solid lines). All experiments were performed at 30 °C in 20 mM K-MOPS, 150 mM NaCl buffered at pH 7.0.

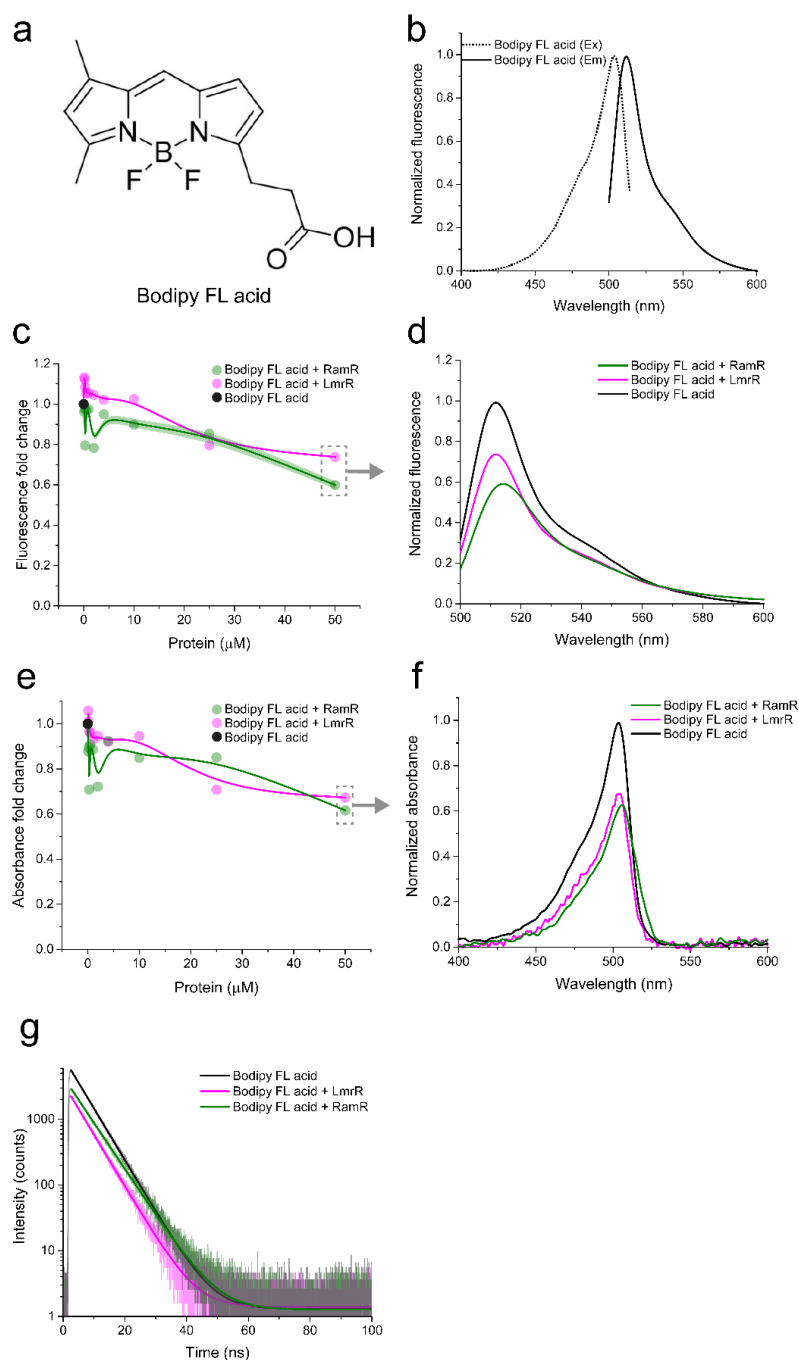

**Fig. S10.** Characterization of CTPEs (RamR: green and LmrR: magenta) with Bodipy FL acid. (a) Structure of Bodipy FL acid. (b) Excitation (dotted line) and emission (solid line) spectra of Bodipy FL acid. (c) Fluorescence fold change of Bodipy FL acid on titration with CTPEs. (d) Fluorescence emission spectra of Bodipy FL acid with CTPEs at a protein:dye molar ratio of 50:1. (e) Absorbance fold-change of Bodipy FL acid on titration with CTPEs. Solid lines represent spline fits, and shaded regions represent s.d. over three independent measurements in panel (c) and (e). (f) Absorption spectra of Bodipy FL acid with CTPEs at a protein:dye molar ratio of 50:1. (g) Fluorescence lifetime spectra of Bodipy FL acid with CTPEs at a protein:dye molar ratio of 50:1 fit with a mono-exponential decay function (solid lines). All experiments were performed at 30 °C in 20 mM K-MOPS, 150 mM NaCl buffered at pH 7.0.

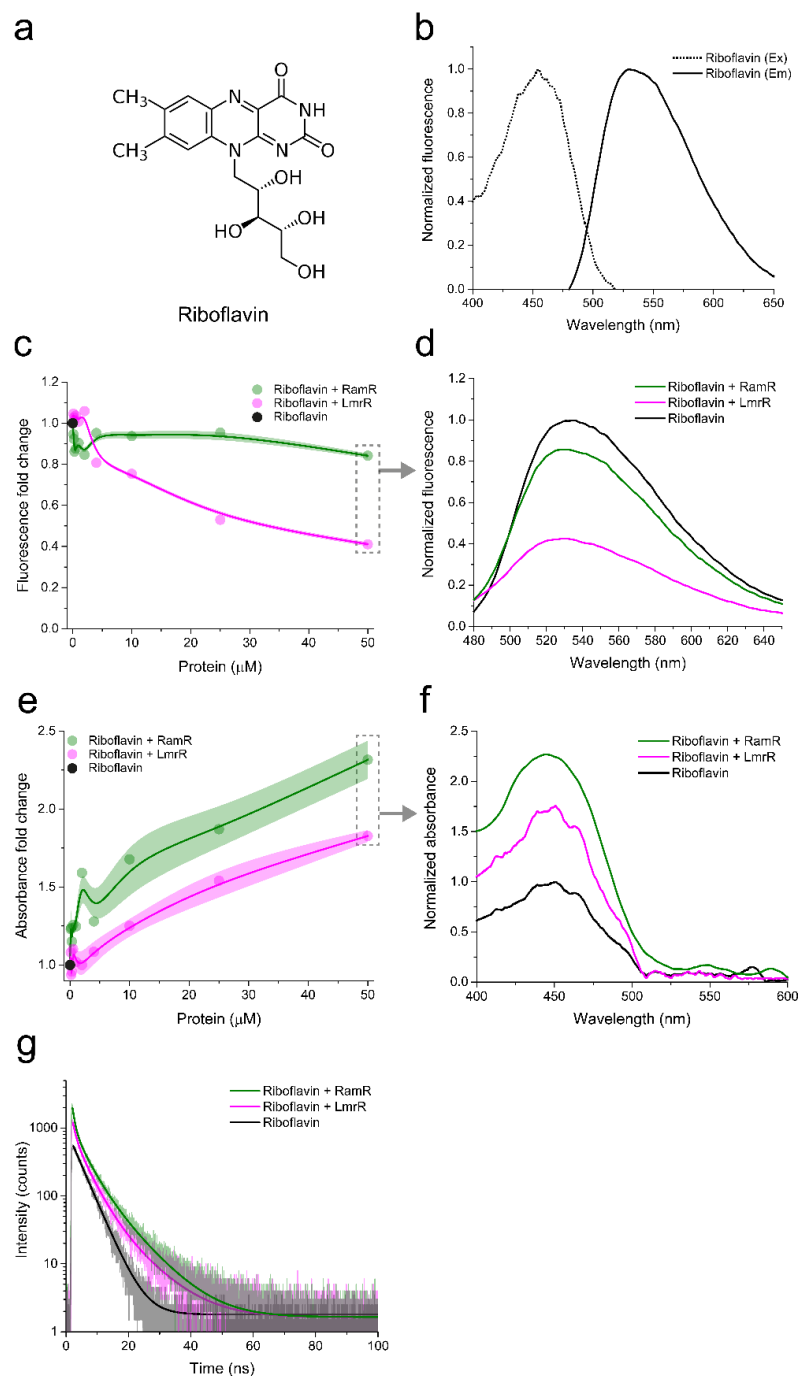

**Fig. S11.** Characterization of CTPEs (RamR: green and LmrR: magenta) with Riboflavin. (a) Structure of Riboflavin. (b) Excitation (dotted line) and emission (solid line) spectra of Riboflavin. (c) Fluorescence fold change of Riboflavin on titration with CTPEs. (d) Fluorescence emission spectra of Riboflavin with CTPEs at a protein:dye molar ratio of 50:1. (e) Absorbance fold-change of Riboflavin on titration with CTPEs. Solid lines represent spline fits, and shaded regions represent s.d. over three independent measurements in panel c) and e). (f) Absorption spectra of Riboflavin with CTPEs at a protein:dye molar ratio of 50:1. (g) Fluorescence lifetime spectra of Riboflavin with CTPEs at a protein:dye molar ratio of 50:1 fit with a bi-exponential decay function (solid lines). All experiments were performed at 30 °C in 20 mM K-MOPS, 150 mM NaCl buffered at pH 7.0.

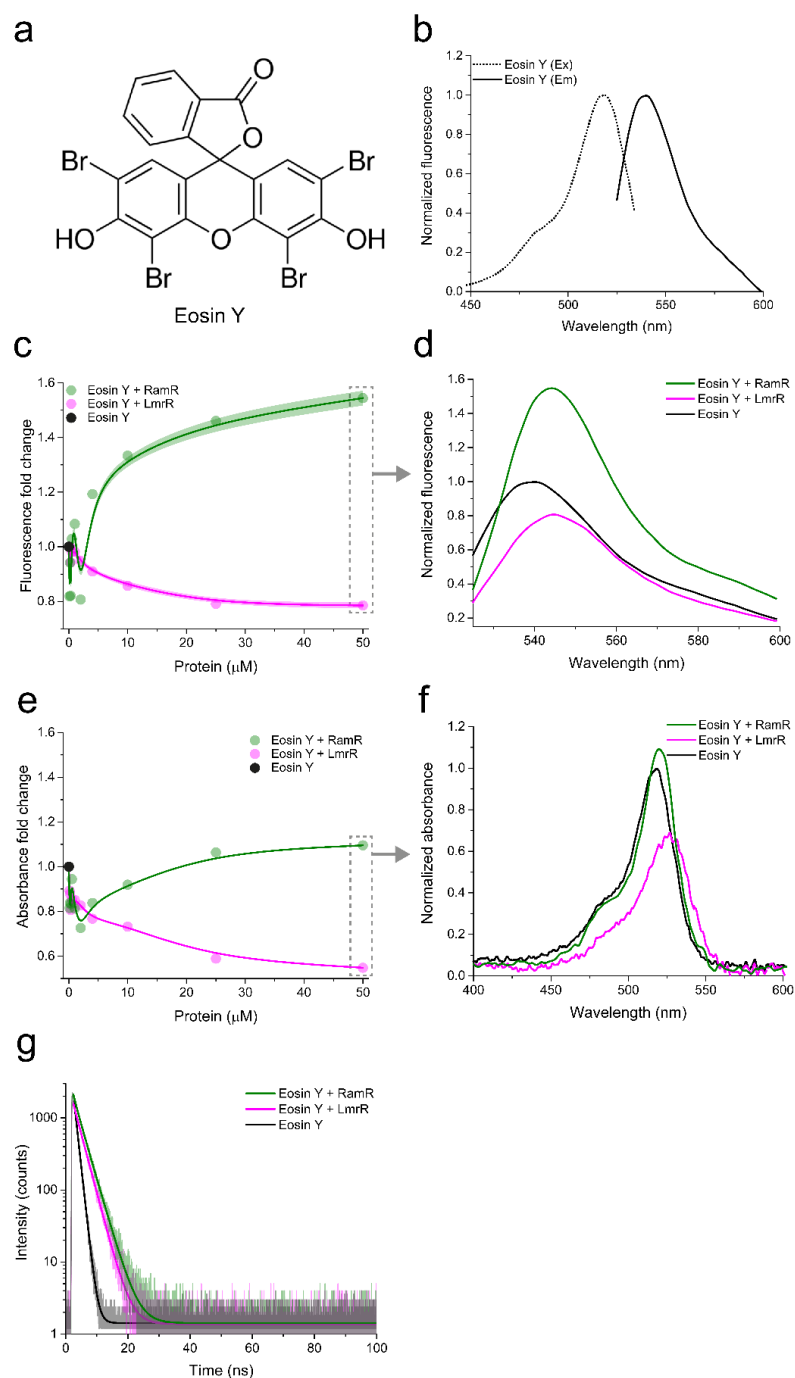

**Fig. S12.** Characterization of CTPEs (RamR: green and LmrR: magenta) with Eosin Y. (a) Structure of Eosin Y. (b) Excitation (dotted line) and emission (solid line) spectra of Eosin Y. (c) Fluorescence fold change of Eosin Y on titration with CTPEs. (d) Fluorescence emission spectra of Eosin Y with CTPEs at a protein:dye molar ratio of 50:1. (e) Absorbance fold-change of Eosin Y on titration with CTPEs. Solid lines represent spline fits, and shaded regions represent s.d. over three independent measurements in panel c) and e). (f) Absorption spectra of Eosin Y with CTPEs at a protein:dye molar ratio of 50:1. (g) Fluorescence lifetime spectra of Eosin Y with CTPEs at a protein:dye molar ratio of 50:1 fit with a mono-exponential decay function (solid lines). All experiments were performed at 30 °C in 20 mM K-MOPS, 150 mM NaCl buffered at pH 7.0.

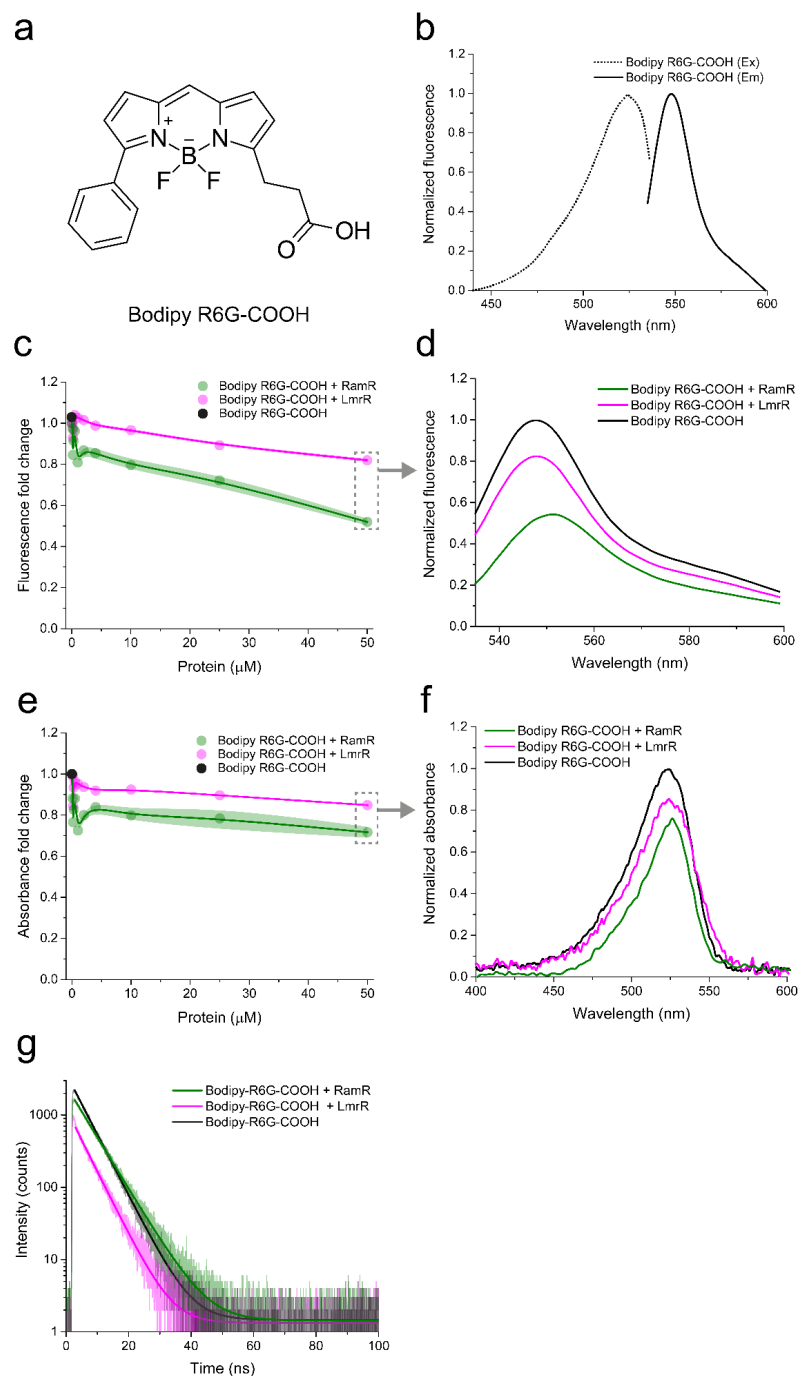

**Fig. S13.** Characterization of CTPEs (RamR: green and LmrR: magenta) with Bodipy R6G. (a) Structure of Bodipy R6G. (b) Excitation (dotted line) and emission (solid line) spectra of Bodipy R6G. (c) Fluorescence fold change of Bodipy R6G on titration with CTPEs. (d) Fluorescence emission spectra of Bodipy R6G with CTPEs at a protein:dye molar ratio of 50:1. (e) Absorbance fold-change of Bodipy R6G on titration with CTPEs. Shaded regions in panel c) and e) represent s.d. over three independent measurements. (f) Absorption spectra of Bodipy R6G with CTPEs at a protein:dye molar ratio of 50:1. (g) Fluorescence lifetime spectra of Bodipy R6G with CTPEs at a protein:dye molar ratio of 50:1 fit with a mono-exponential decay function (solid lines). All experiments were performed at 30 °C in 20 mM K-MOPS, 150 mM NaCl buffered at pH 7.0.

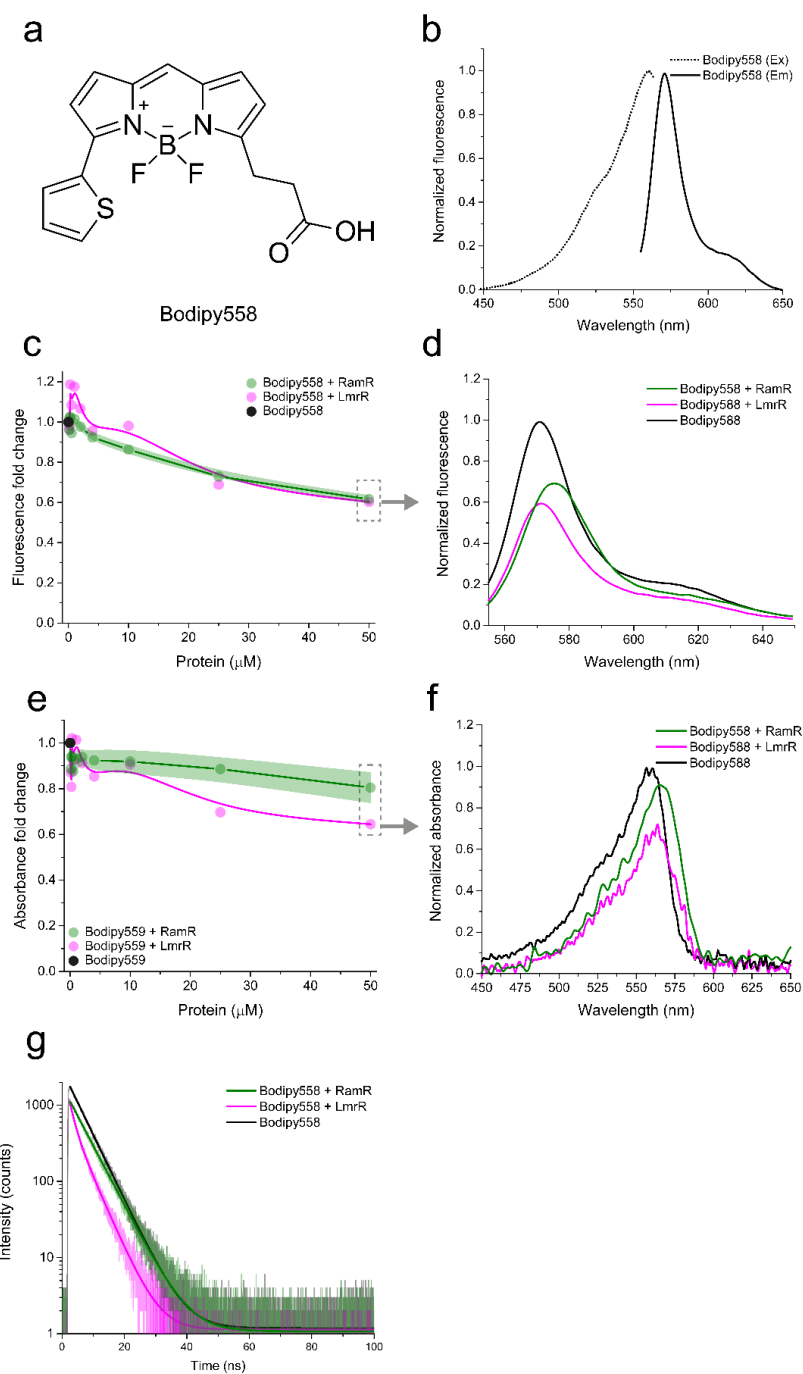

**Fig. S14.** Characterization of CTPEs (RamR: green and LmrR: magenta) with Bodipy558. (a) Structure of Bodipy558. (b) Excitation (dotted line) and emission (solid line) spectra of Bodipy558. (c) Fluorescence fold change of Bodipy558 on titration with CTPEs. (d) Fluorescence emission spectra of Bodipy558 with CTPEs at a protein:dye molar ratio of 50:1. (e) Absorbance fold-change of Bodipy558 on titration with CTPEs. Shaded regions in panel c) and e) represent s.d. over three independent measurements. (f) Absorption spectra of Bodipy558 with CTPEs at a protein:dye molar ratio of 50:1. (g) Fluorescence lifetime spectra of Bodipy558 with CTPEs at a protein:dye molar ratio of 50:1 fit with a mono-exponential decay function (solid lines). All experiments were performed at 30 °C in 20 mM K-MOPS, 150 mM NaCl buffered at pH 7.0.

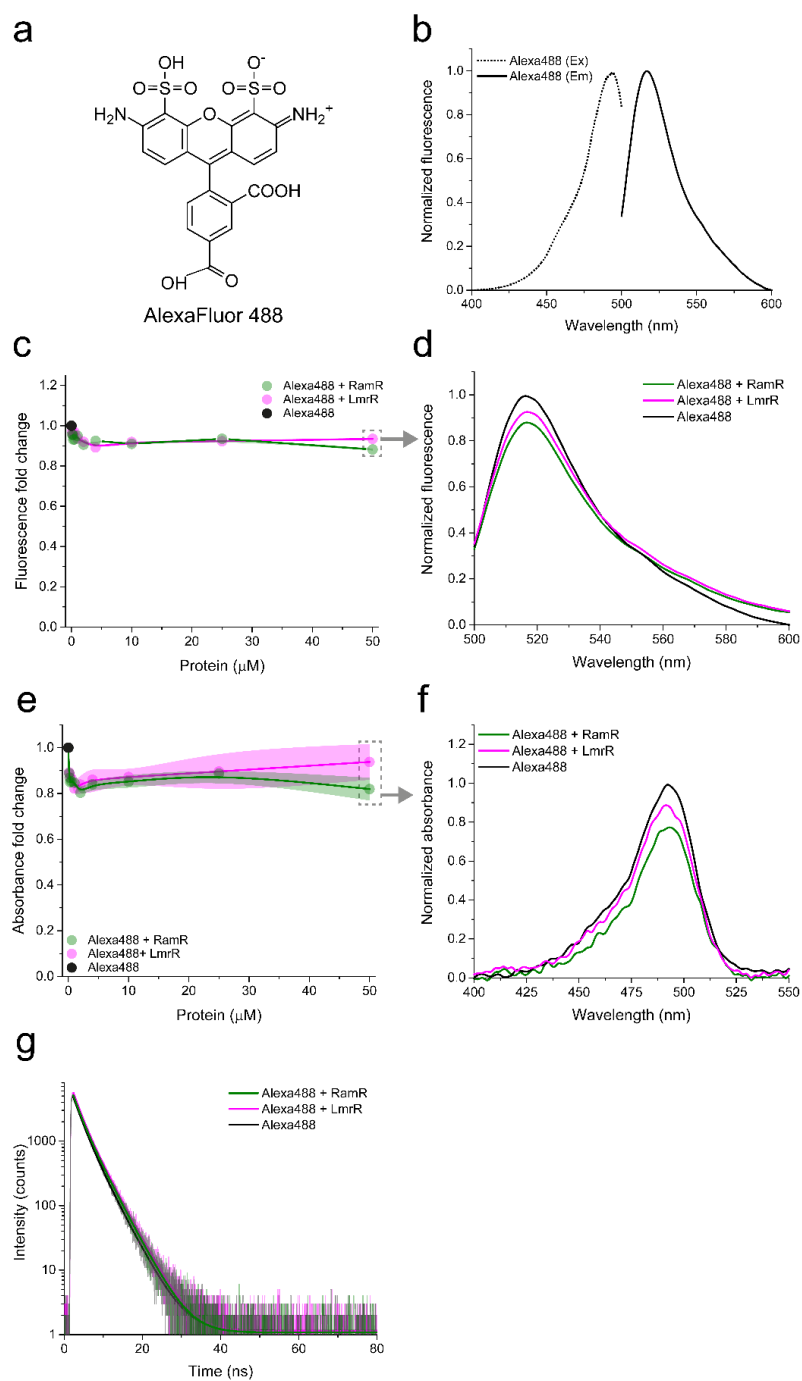

**Fig. S15.** Characterization of CTPEs (RamR: green and LmrR: magenta) with Alexa488. (a) Structure of Alexa488. (b) Excitation (dotted line) and emission (solid line) spectra of Alexa488. (c) Fluorescence fold change of Alexa488 on titration with CTPEs. (d) Fluorescence emission spectra of Alexa488 with CTPEs at a protein:dye molar ratio of 50:1. (e) Absorbance fold-change of Alexa488 on titration with CTPEs. Shaded regions in panel c) and e) represent s.d. over three independent measurements. (f) Absorption spectra of Alexa488 with CTPEs at a protein:dye molar ratio of 50:1. (g) Fluorescence lifetime spectra of Alexa488 with CTPEs at a protein:dye molar ratio of 50:1 fit with a mono-exponential decay function (solid lines). All experiments were performed at 30 °C in 20 mM K-MOPS, 150 mM NaCl buffered at pH 7.0.



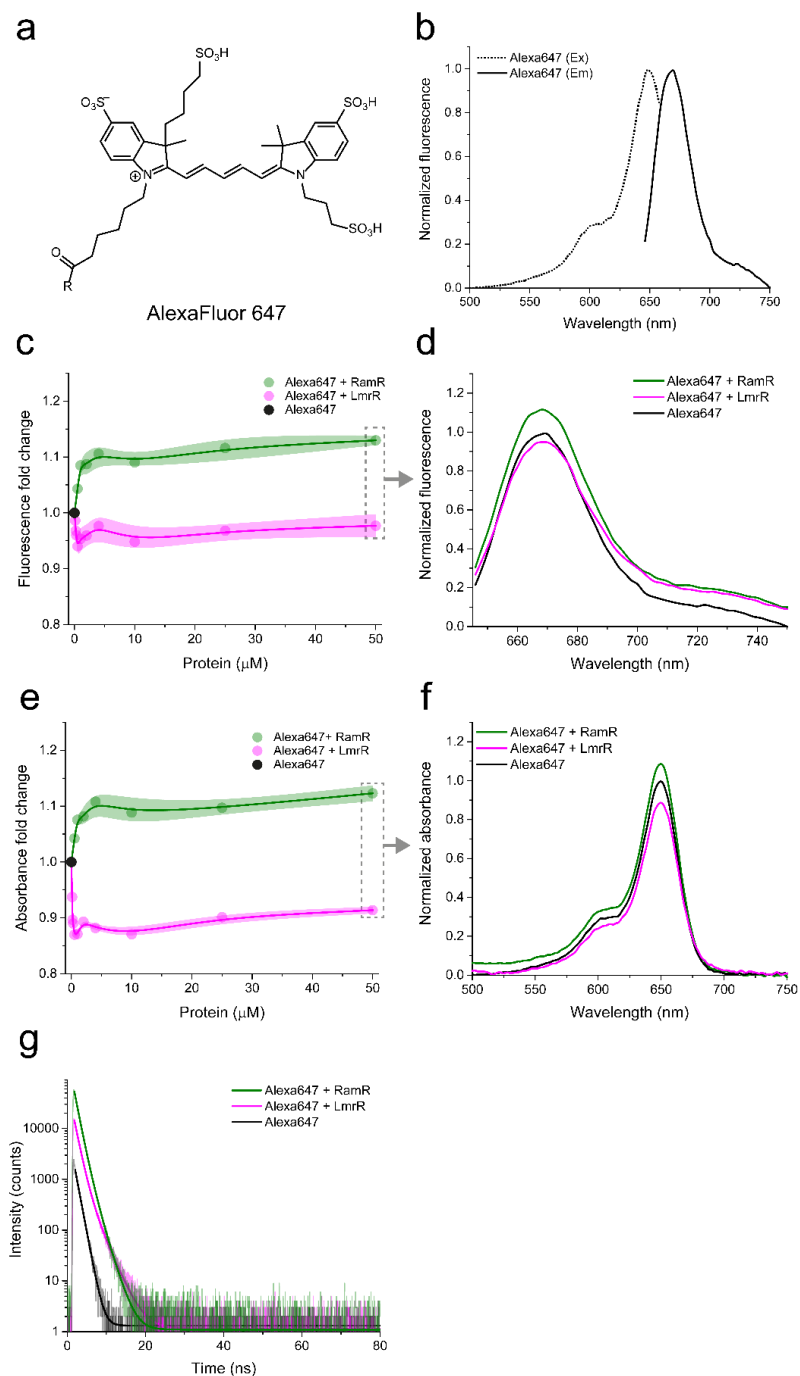

**Fig. S16.** Characterization of CTPEs (RamR: green and LmrR: magenta) with Alexa647. (a) Structure of Alexa647. (b) Excitation (dotted line) and emission (solid line) spectra of Alexa647. (c) Fluorescence fold change of Alexa647 on titration with CTPEs. (d) Fluorescence emission spectra of Alexa647 with CTPEs at a protein:dye molar ratio of 50:1. (e) Absorbance fold-change of Alexa647 on titration with CTPEs. Shaded regions in panel c) and e) represent s.d. over three independent measurements. (f) Absorption spectra of Alexa647 with CTPEs at a protein:dye molar ratio of 50:1. (g) Fluorescence lifetime spectra of Alexa647 with CTPEs at a protein:dye molar ratio of 50:1 fit with a mono-exponential decay function (solid lines). All experiments were performed at 30 °C in 20 mM K-MOPS, 150 mM NaCl buffered at pH 7.0.

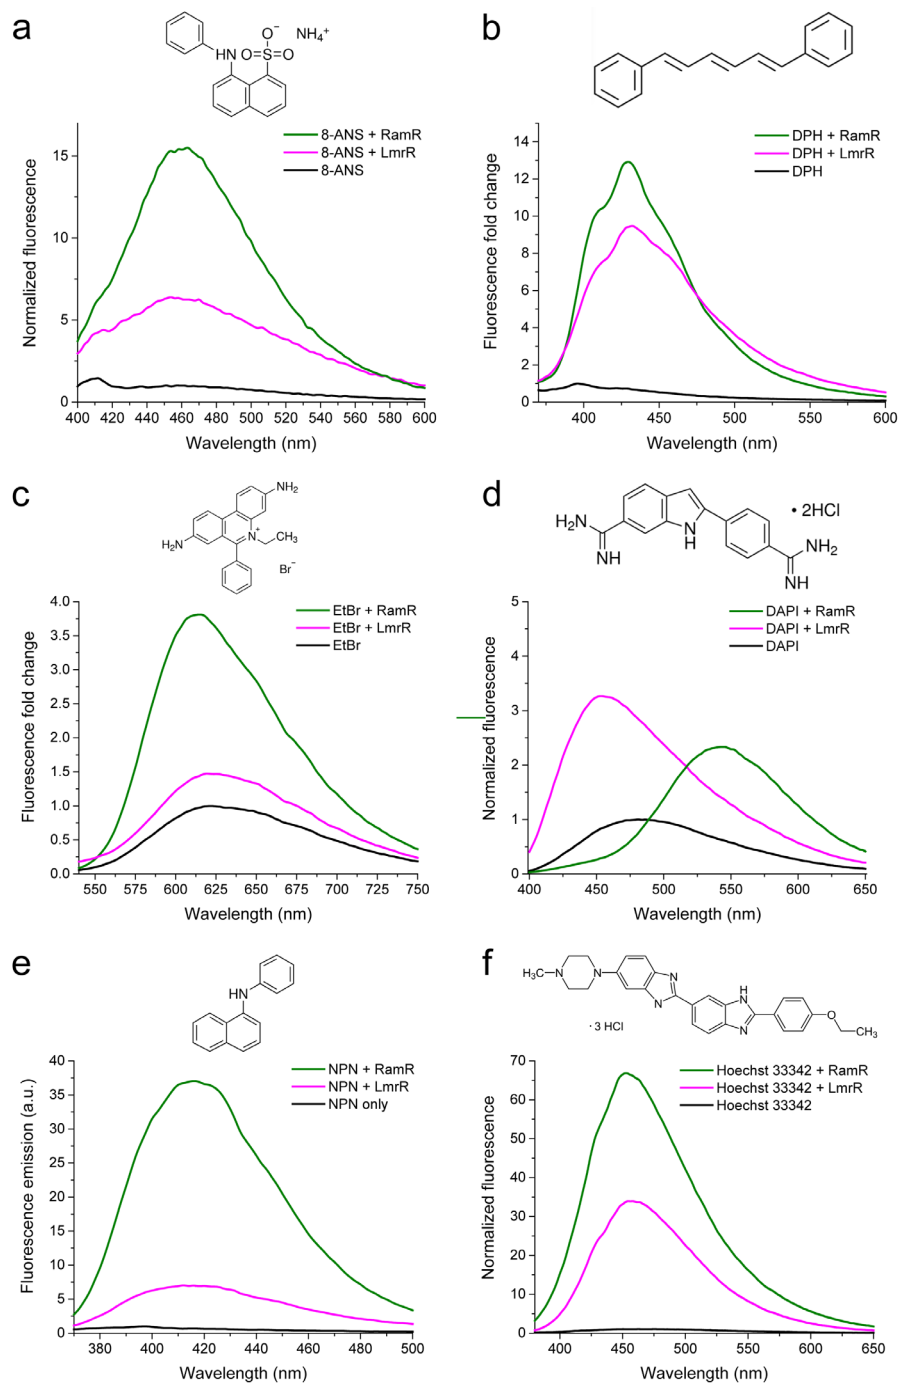

**Fig. S17.** Fluorescence emission spectra of nonspecific intercalating dyes with CTPEs (RamR: green and LmrR: magenta) with (a) 8-Anilinonaphthalene-1-sulfonic acid (ANS), (b) 1,6-diphenyl-1,3,5-hexatriene (DPH), (c) ethidium bromide (EtBr), (d) 4',6-diamidino-2-phenylindole (DAPI), (e) 1-N-phenylnaphthylamine (NPN), and (f) Hoechst 33342 at protein:dye molar ratio of 50:1. The corresponding dye structures are indicated above each panel. All experiments were performed at 30 °C in 20 mM K-MOPS, 150 mM NaCl buffered at pH 7.0.

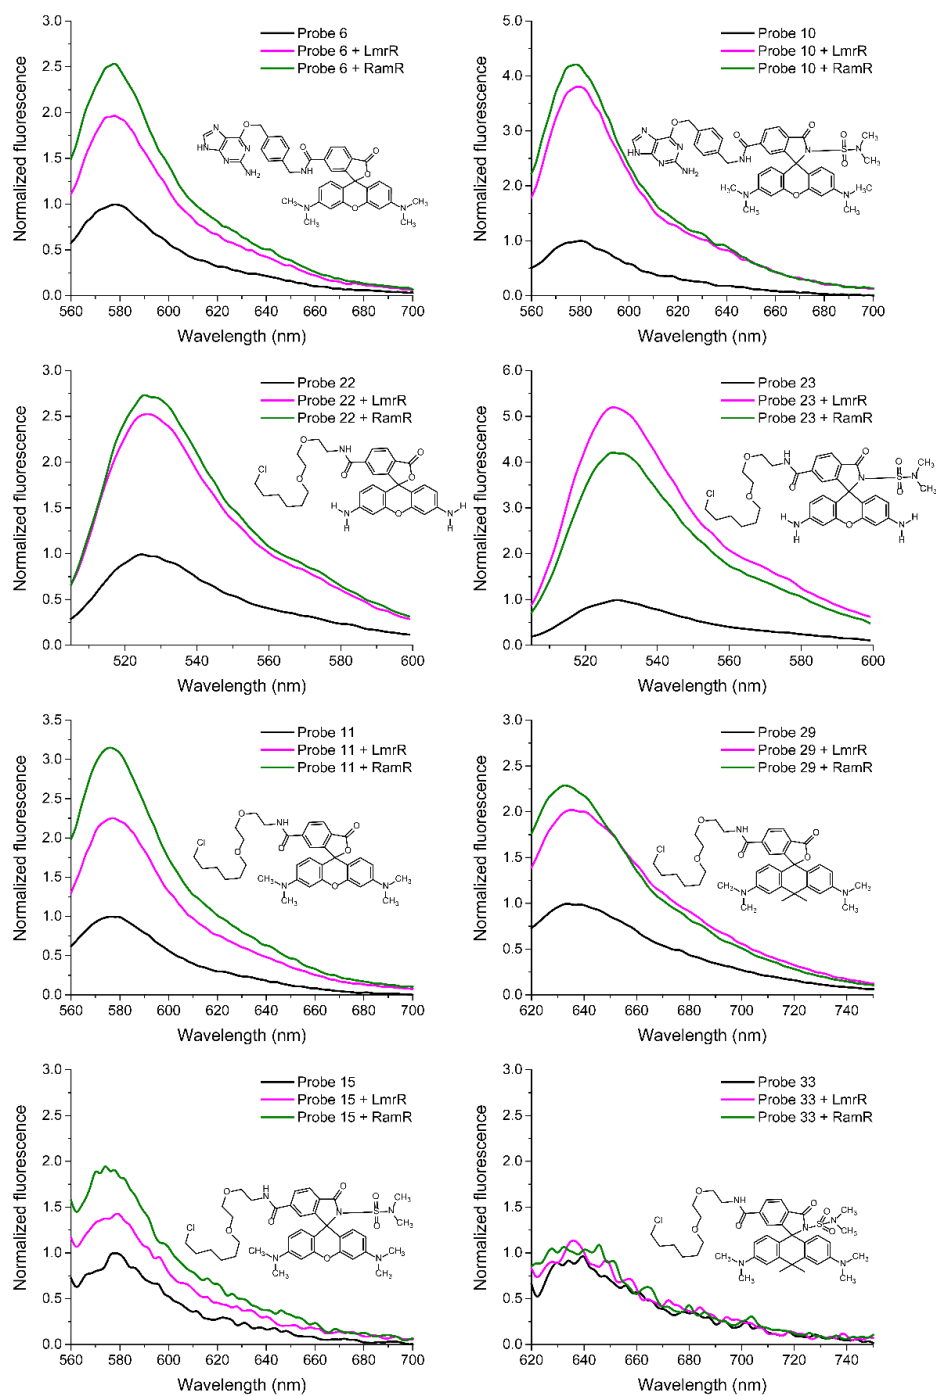

**Fig. S18.** Fluorescence emission spectra of 6-TAMRA modified (MaP) probes (Wang et al. 2020) with CTPEs at a protein:dye molar ratio of 50:1. MaP probes comprise of 6-TAMRA covalently linked to the SNAP-Tag ligand: O<sup>6</sup>-benzyl guanidine (Probe 6 and Probe 10) or to the Halo-Tag ligand (Probe 11, 15, 22, 23, 29 and 33). All experiments were performed at 30 °C in 20 mM K-MOPS, 150 mM NaCl buffered at pH 7.0.

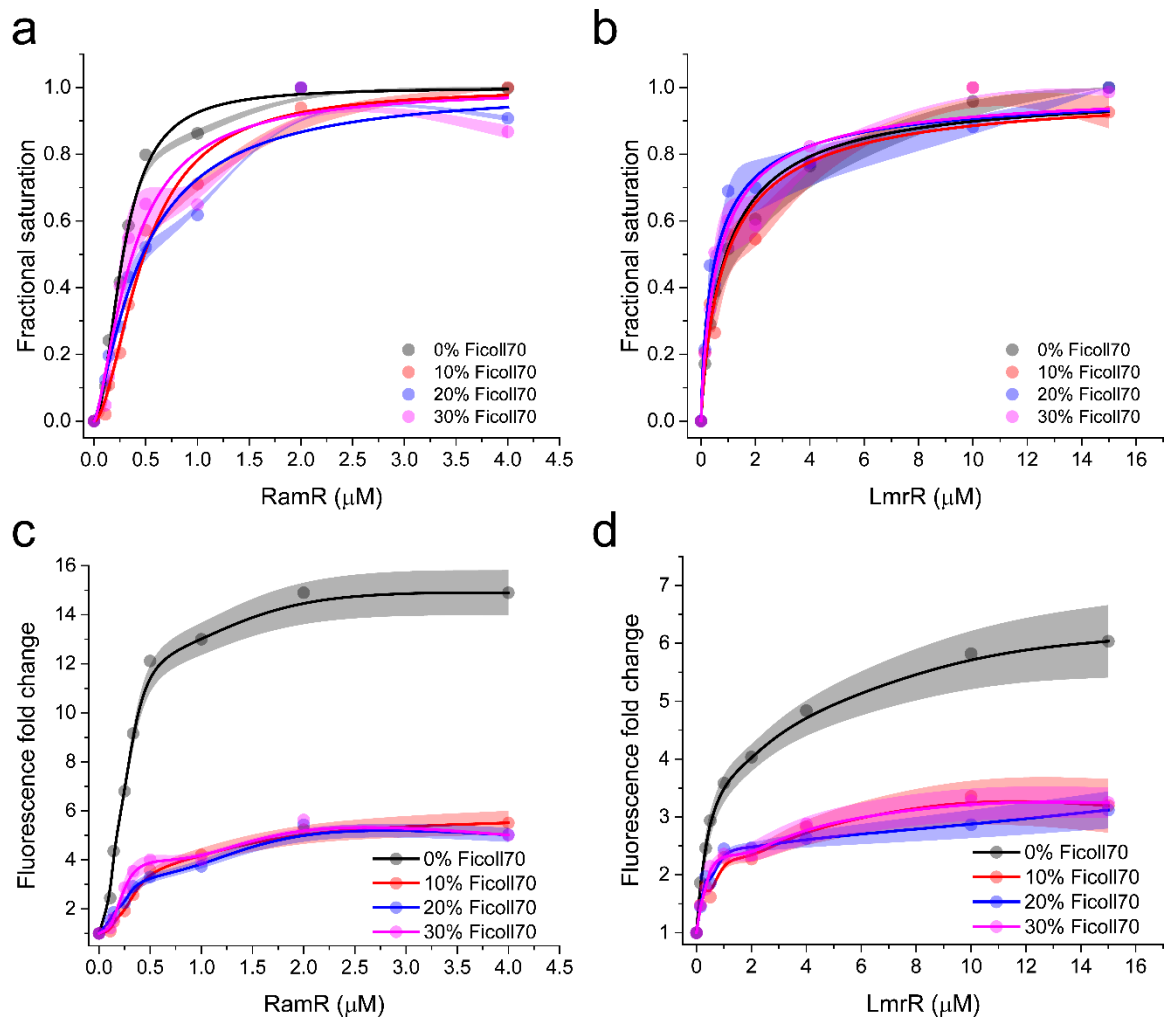

**Fig. S19.** Effect of Ficoll70 on the fluorescence of Bodipy495 in the presence of CTPEs (a,c) RamR and (b,d) LmrR. Saturation experiments were performed by titrating the respective CTPe tag with  $1 \mu\text{M}$  Bodipy495. The fold change in emission fluorescence of Bodipy495 with increasing concentrations of Ficoll70 is shown in panel c and d. All experiments were performed at  $30 \text{ }^\circ\text{C}$  in  $20 \text{ mM}$  K-MOPS,  $150 \text{ mM}$  NaCl buffered at pH 7.0.

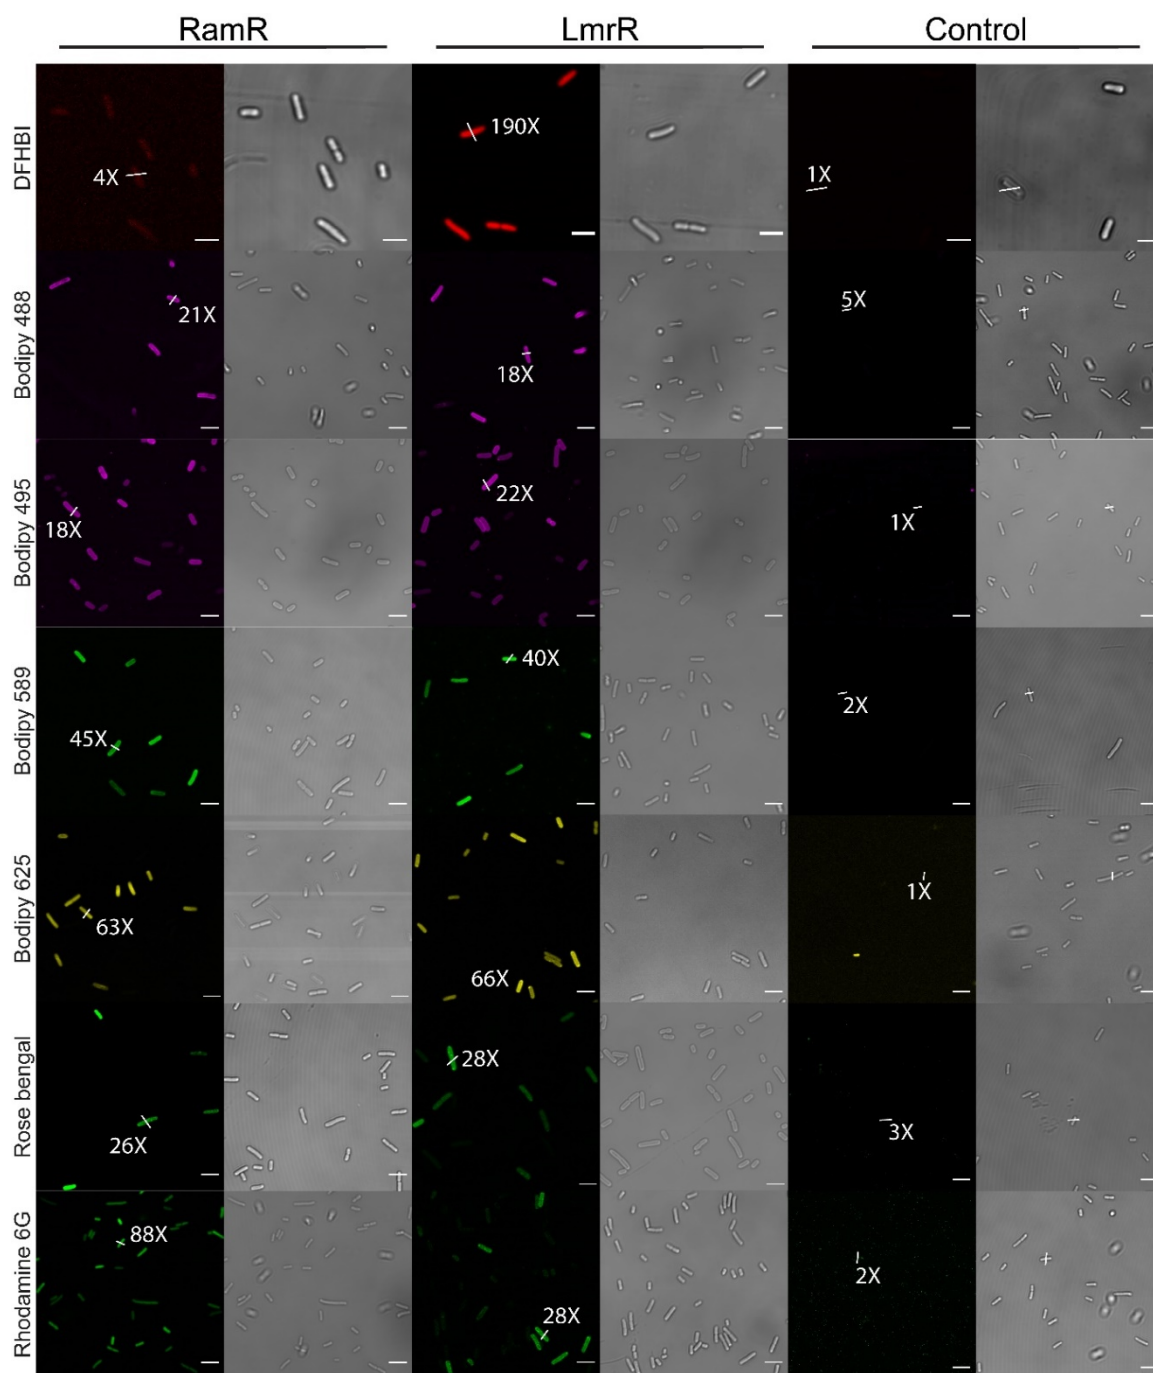

**Fig. S20.** Overview of labeled *E. coli* cells expressing cytoplasmic CTPEs from a pBAD vector. The signal to background fluorescence ratios for arbitrarily picked cells for each dye is mentioned next to white overlays. All measurements were performed at 30 °C using 15  $\mu$ M of corresponding dye. For controls, the signal to background ratio was minimal for all samples. The scale bar is 3  $\mu$ m.

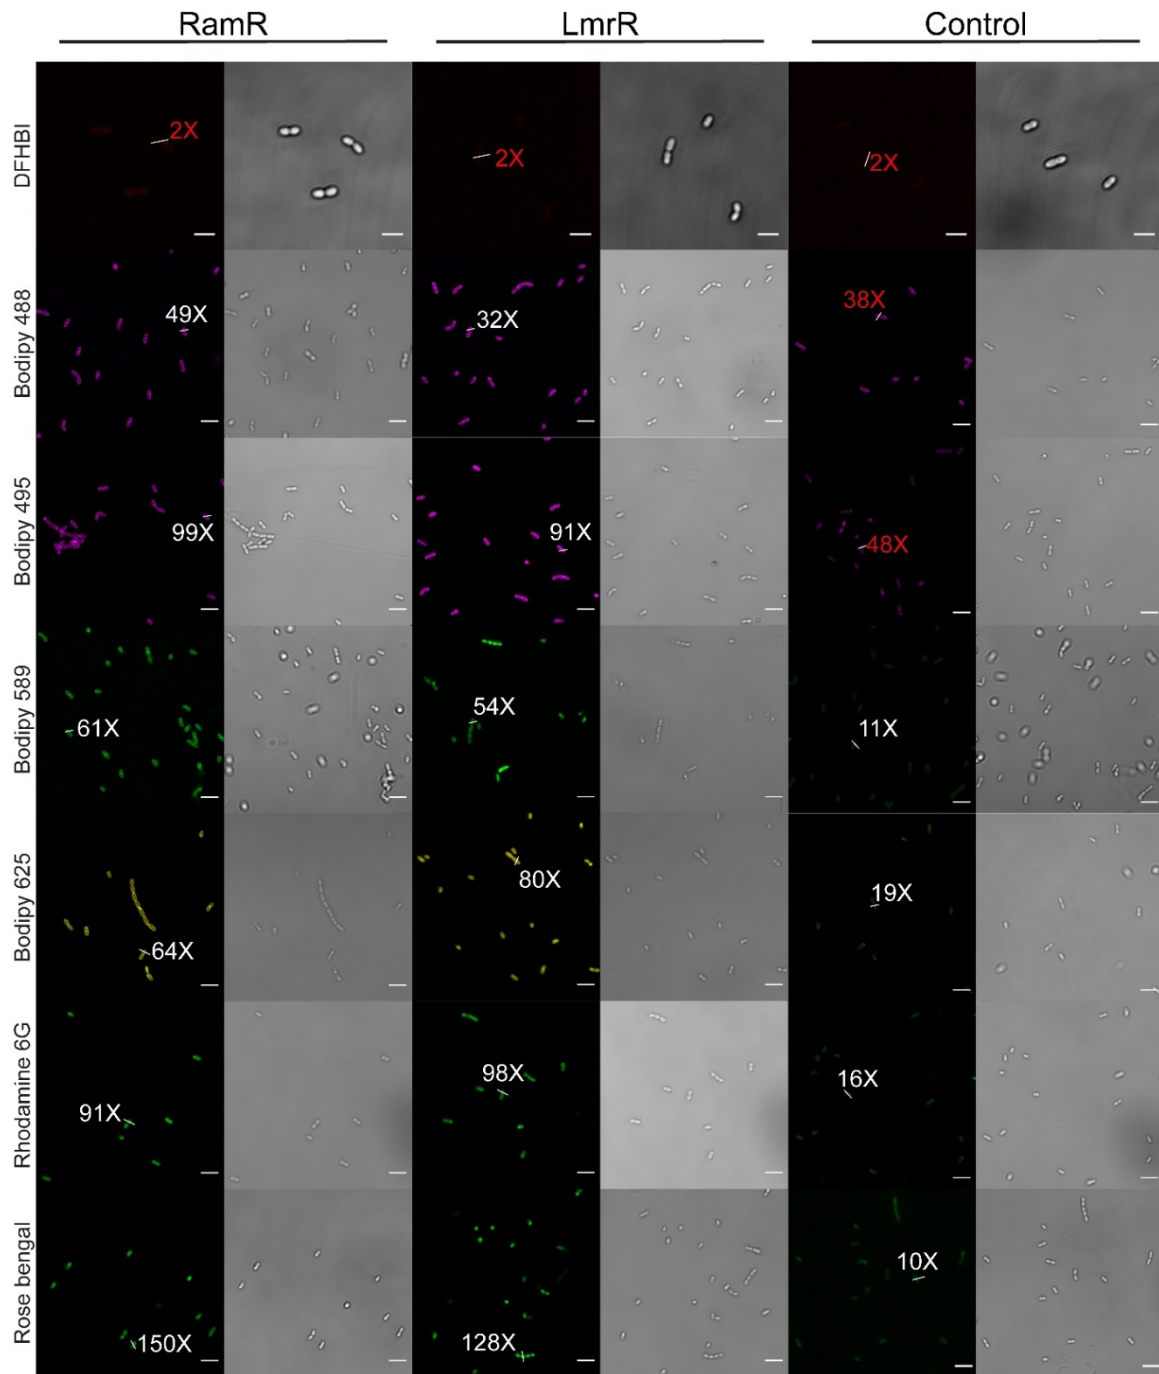

**Fig. S21.** Overview of labeled *L. lactis* cells expressing cytoplasmic CTPEs from a pNSC8048 (LmrR) and pNZC3GH vector (RamR) respectively. The signal to background fluorescence ratios for arbitrarily picked cells for each dye is mentioned next to white overlays and non-specific staining is depicted as red overlays. All measurements were performed at 30 °C using 15  $\mu$ M of corresponding dye. For controls, Bodipy495 and Bodipy488 showed significant non-specific staining and, DFHBI was impermeable suggesting their inapplicability under our experimental conditions. All samples indicating some background staining. Scale bar is 3  $\mu$ m.

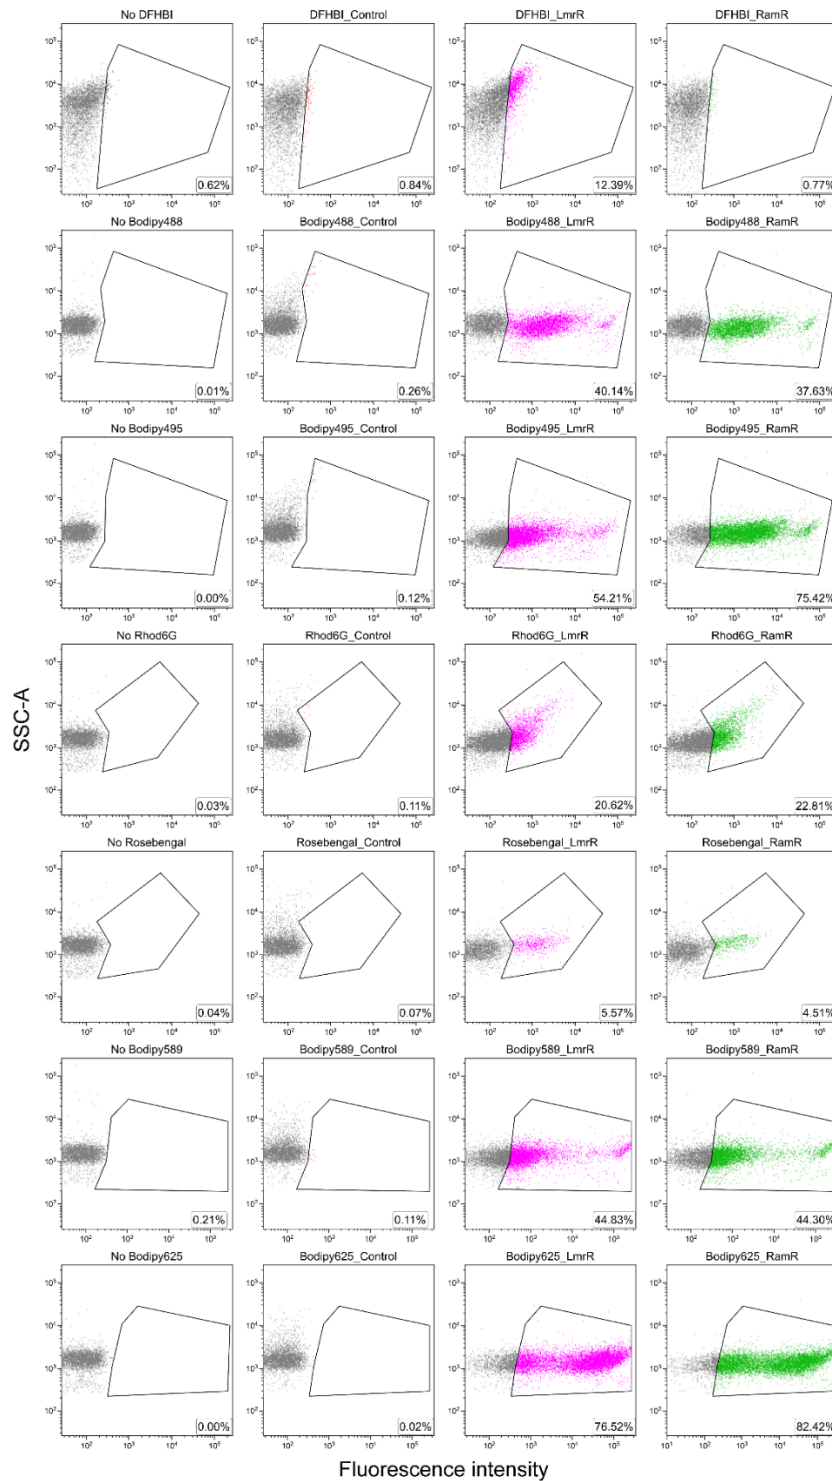

**Fig. S22.** Flow cytometry side scatter area plots (SSC-A) of *E. coli* cells without any dye (gated black), expressing the cytoplasmic protein OsmY with corresponding dye (control: gated red), expressing LmrR (gated magenta) and expressing RamR (gated green). The low fraction of DFHBI labeled cells with LmrR is likely due to inefficient excitation and collection channels (See methods) as the percentages are significantly lower than estimations of the number of fluorescent cells from microscopy images (see **Supplementary Fig. 20**). The bottom right in each panel shows the % of gated (labeled) cells from a total population of 10,000 cells.



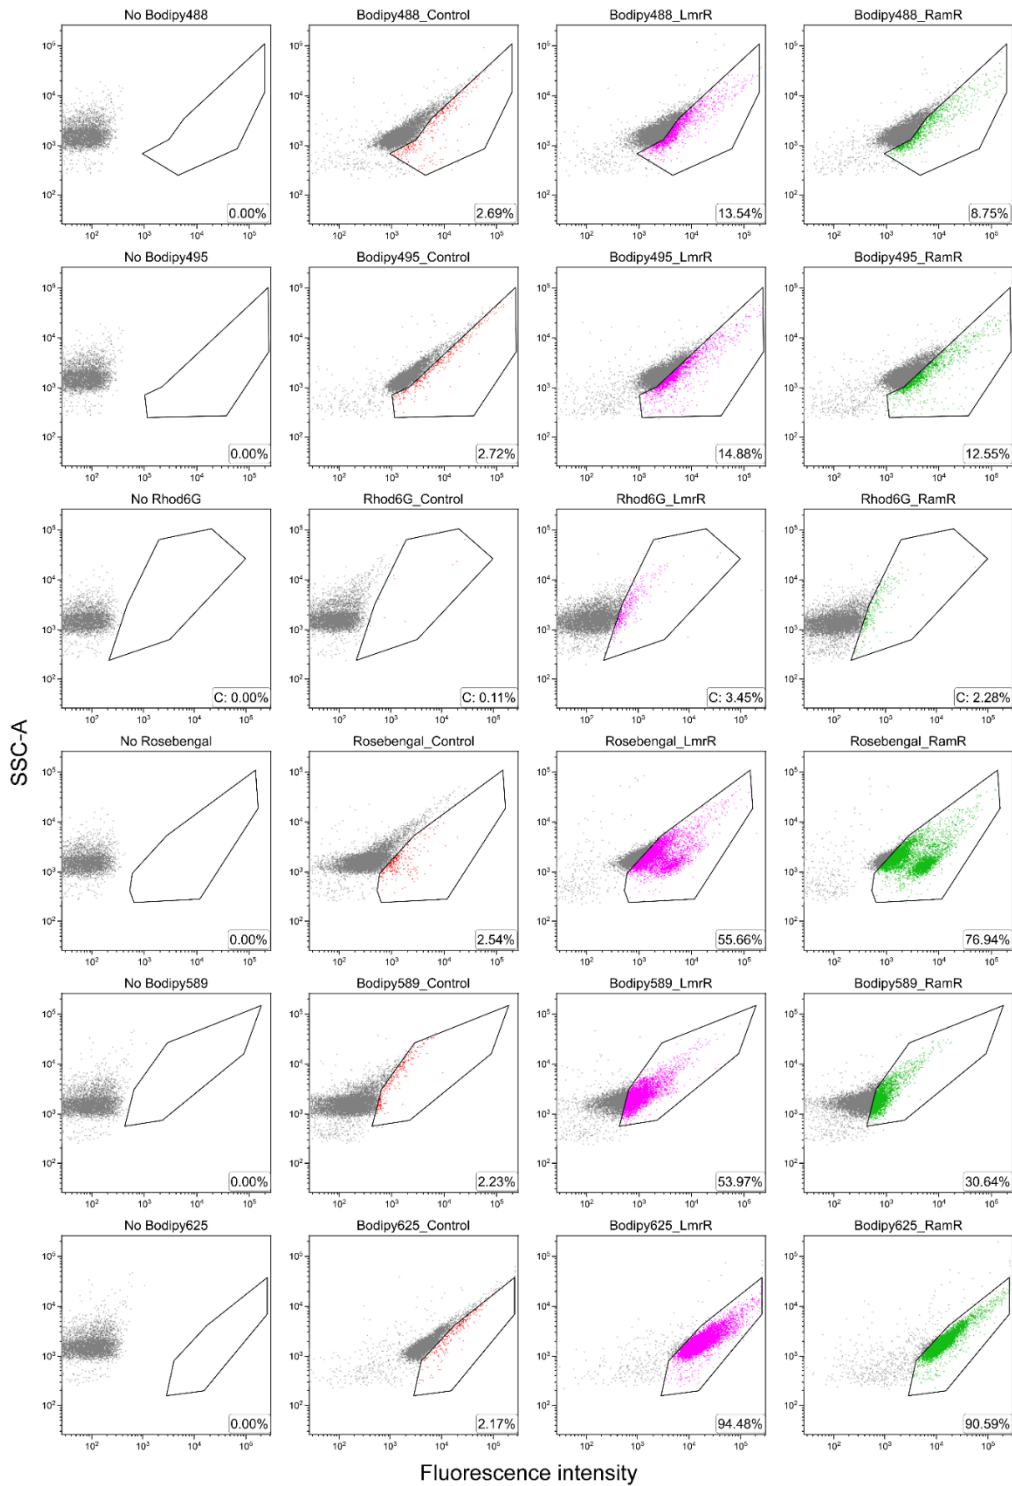

**Fig. S23.** Flow cytometry side scatter area plots (SSC-A) of  $\Delta lmrR$  *L. lactis* cells without any dye (gated black), with corresponding dye (control; gated red), expressing LmrR (gated magenta) and RamR (gated green). The bottom right in each panel shows the % of gated (labeled) cells from a total population of 10,000 cells.



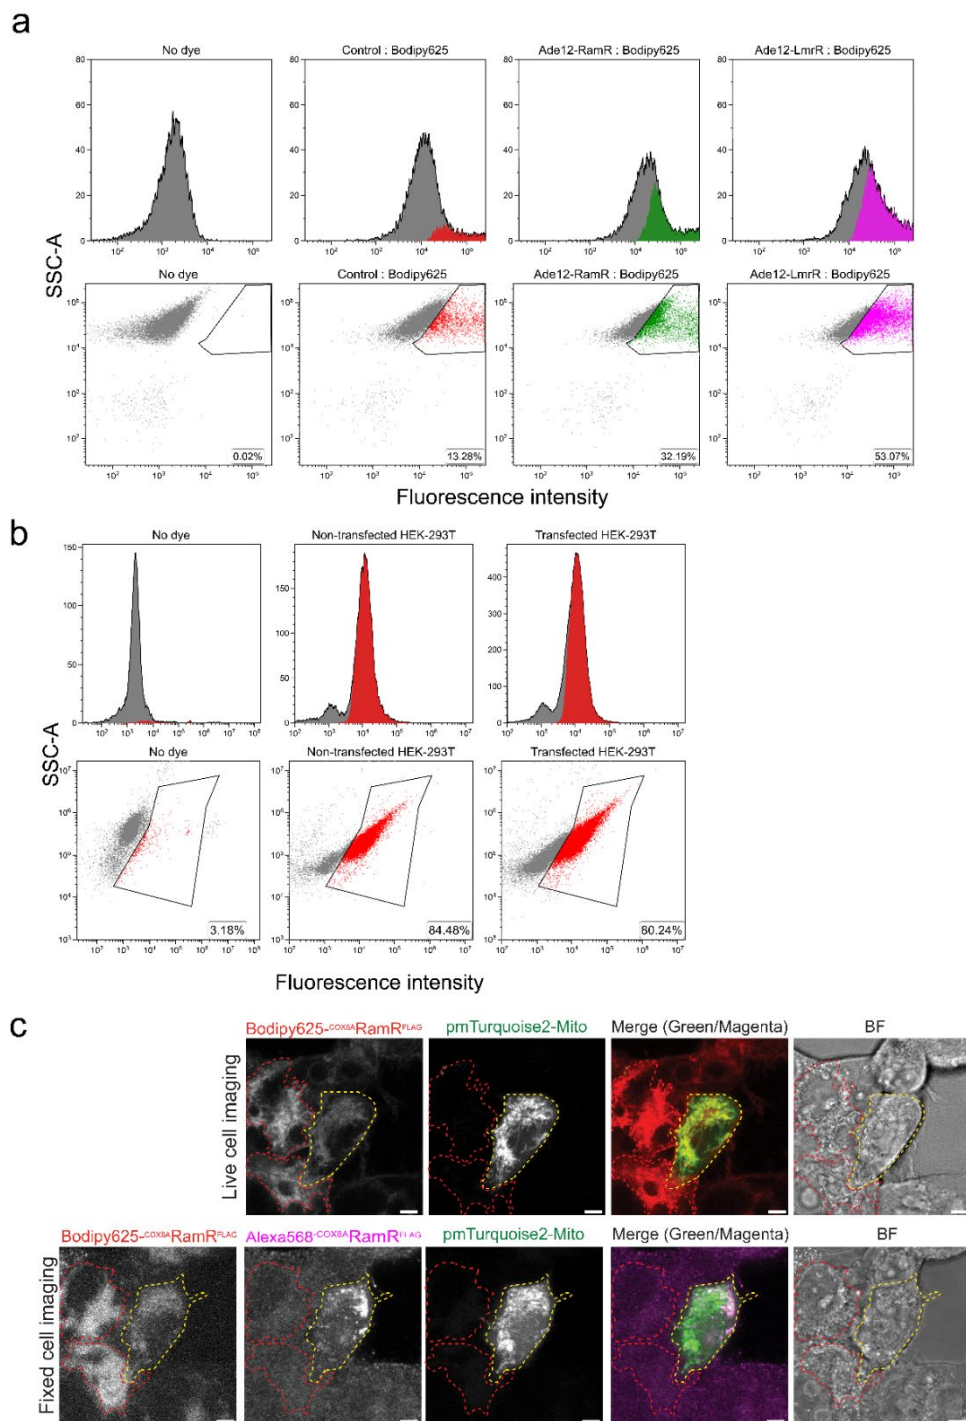

**Fig. S24.** Flow cytometry side scatter area plots (SSC-A) of *Saccharomyces cerevisiae* (panel a) and HEK-293T cells with Bodipy625 (panel b). Control *S. cerevisiae* (SR80) cells exhibit some background staining that possibly emanates from either non-specific interaction with the cell-wall and/or lipid membrane. *S. cerevisiae* cells expressing Ade-LmrR or Ade-RamR have enhanced fluorescence compared to untransformed *S. cerevisiae* (SR80) cells. FACS analysis of unspecific uptake of Bodipy625 by untransfected HEK-293T cells with no Bodipy625 added and those after the addition of Bodipy625. (b) Untransfected HEK-293T cells exhibit significant uptake (~ 84% labeled cells) of Bodipy625 compared to transfected HEK-293T cells. (c) High background staining was observed in both untransfected (red borders) and transfected (yellow borders) cells.

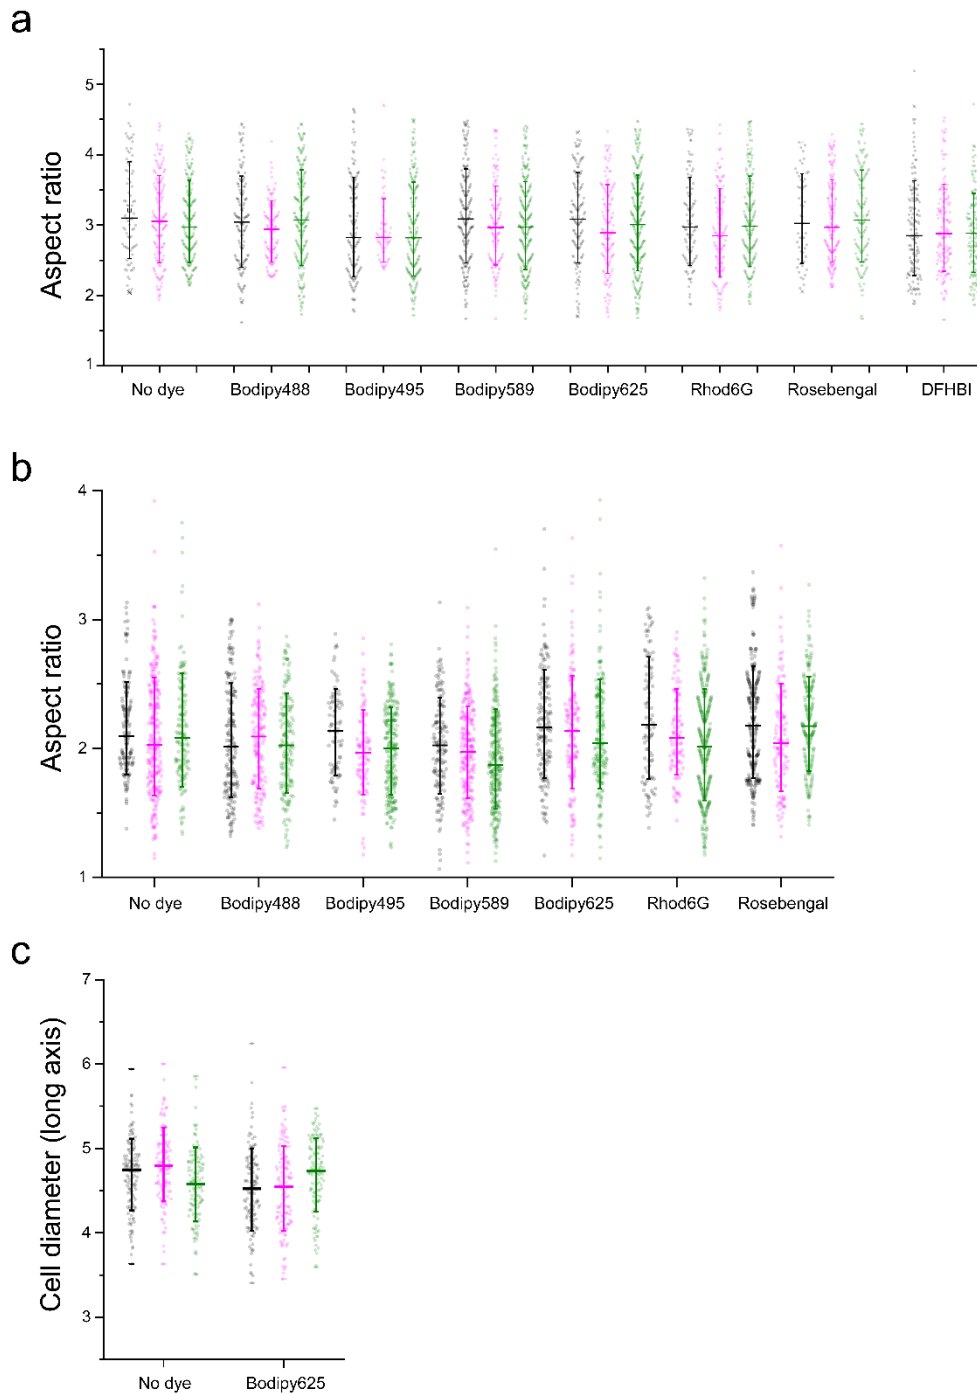

**Fig. S25.** Effect of dye labeling on CTPEs on cell morphology ascertained by phase-contrast microscopy. The aspect ratio (length divided by width) plotted for unlabeled and dye-labeled (a) *E. coli*, (b) *L. lactis*, and (c) cell diameter along the long axis for spherical *S. cerevisiae* cells represented in black (control), magenta (LmrR) and green (RamR) as measured from phase-contrast microscopy in the mid-exponential growth phase. The impact of cell diameters for *S. cerevisiae* cells was assessed only with Bodipy625 dye since other dyes did not permeate through the cell-wall. The horizontal bars indicate median values, and the vertical bars indicate standard deviation in the sample of at least 100 cells in each case. Images were analyzed using the MicrobeJ plugin<sup>1</sup> in Fiji software.

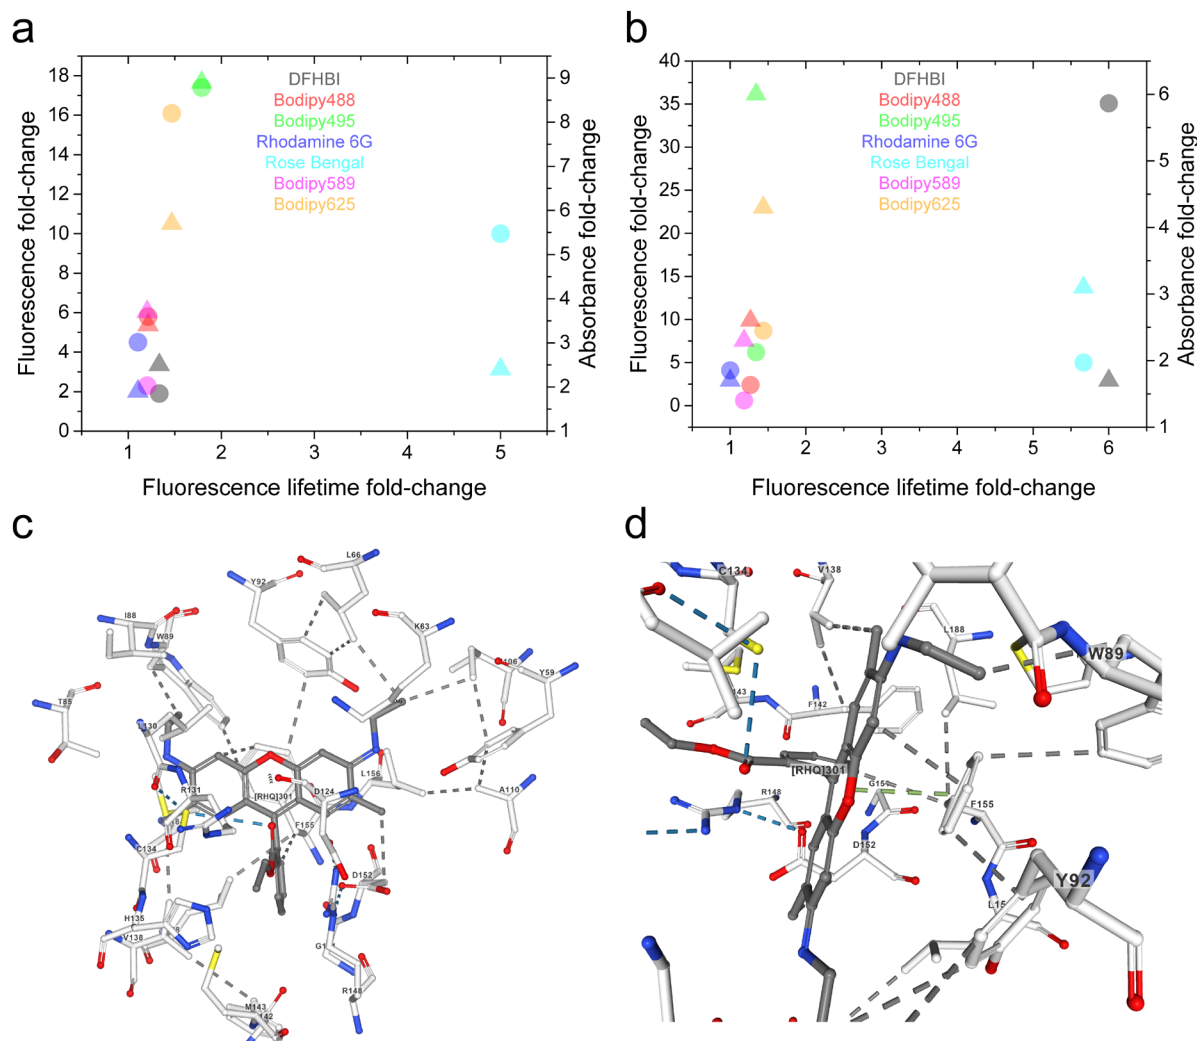

**Fig. S26.** a-b) Correlation plots of fold-changes in emission fluorescence and absorbance with fold-changes in fluorescence lifetimes for RamR (panel a) and LmrR (panel b). Identical colors depicting fluorescence fold-change (circles) and absorbance fold-changes (squares) indicate the same dye. c-d) An interaction map of a crystal structure of Rhodamine 6G-Bound form of RamR depicting hydrophobic contacts (grey lines) and hydrogen bonds (blue lines). The  $\pi$ - $\pi$  stacking interactions between Phe155 and Rhodamine 6G are shown in light green (panel b). Interactions are determined by geometric criteria as described in PoseView<sup>2</sup>. Image created with Rhodamine 6G-Bound form of RamR using the PDB ID: 3VVZ on NGL Viewer<sup>3</sup>.

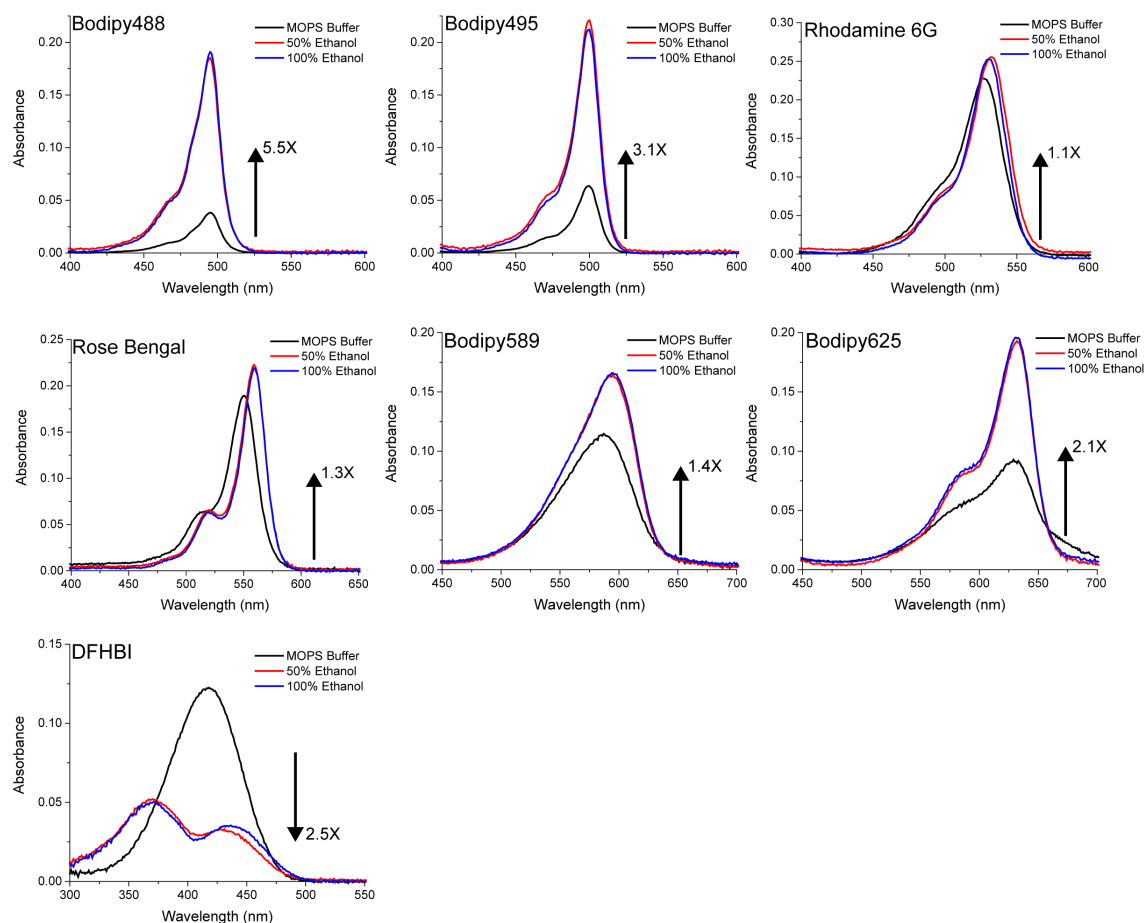

**Fig. S27.** Absorption spectra of seven fluorogenic dyes in different solvents. The absorption spectra were recorded at 5  $\mu\text{M}$  dye in 20 mM K-MOPS, 150 mM NaCl buffer at pH 7.0 (black traces), in the same buffer with 50% ethanol (red traces), and 100% ethanol (blue traces) at room temperature. The black arrows next to the curves depict the fold-change in peak absorption. The spectra recorded in 50% ethanol and 100% ethanol are comparable. The depicted curves are the average from three independent measurements.

**Table S1. Comparison of CTPEs to existing non-covalent fluorogenic tagging systems<sup>†</sup>**

| Parent                                       | Protein tag | Applicable dyes/ fluorogens                                                  | Emission wavelengths (nm) | Fluorescence fold increase | Applicable in bacteria? | Applicable in yeast? | Applicable in eukaryotes? | Fluorescence lifetime (ns) | Ref.       | Kd ( $\mu$ M) | MW (Da)         | Native state | Extinction coefficient ( $M^{-1} cm^{-1}$ ) |         |        |
|----------------------------------------------|-------------|------------------------------------------------------------------------------|---------------------------|----------------------------|-------------------------|----------------------|---------------------------|----------------------------|------------|---------------|-----------------|--------------|---------------------------------------------|---------|--------|
| <b>Transcript on factors</b>                 | CTPE        | DFHBI, Bodipy488, Bodipy495, Rhod6G, Rose bengal, Bodipy589, Bodipy625, etc. | 495-642                   | 2.3-35                     | Yes                     | Yes                  | No                        | Enhanced                   | this study | 0.17-5.0      | 28,000 - 44,000 | Dimer        | 42,000-219,000                              |         |        |
| <b>Photoactive Yellow Protein (PYP)</b>      | Y-FAST      | HBR                                                                          | 530-540                   | 22-191                     | Yes                     | Yes                  | Unknown                   | Unknown                    | 4,5        | 0.62          | 14,000          | Monomer      | 44,000                                      |         |        |
|                                              |             | HMBR                                                                         | 530-541                   | 82-550                     | Yes                     | Yes                  |                           |                            |            | 0.13          |                 |              | 45,000                                      |         |        |
|                                              |             | HBR-3,5-DOM                                                                  | 600                       | 220                        | Unknown                 | Yes                  |                           |                            |            | 0.97          |                 |              | 39,000                                      |         |        |
|                                              | redFAST     | HBR-3,5-DOM                                                                  | 554                       | 6                          | Unknown                 | Yes                  |                           |                            |            | 6             | 1.30            |              | 13,583                                      | 43,000  |        |
|                                              | greenFAST   |                                                                              | 544                       | 8                          | Unknown                 | Yes                  |                           |                            |            |               | 16.20           |              | 13,881                                      | n.d.    |        |
|                                              | nanoFAST    | HBR-DOM2                                                                     | 380-530                   | 253                        | Unknown                 | Unknown              |                           |                            |            | 7             | 0.85            |              | 10,948                                      | 25,500  |        |
| <b>UnaG</b>                                  | UnaG        | Biliverdin                                                                   | 527                       | 7-11                       | Yes                     | Yes                  | 8                         | 9.60E-05                   | 16,500     | 77,300        |                 |              |                                             |         |        |
| <b>Human single chain antibodies (scFVs)</b> | HL1.0.1     | Thiazole orange derivative (TO1)                                             | 530                       | 2,600                      | Unknown                 | Yes                  | Yes                       | Unknown                    | 9,10       | 1.70E-03      | 25,942          | Monomer      | 60,000                                      |         |        |
|                                              | HL4         | Malachite green derivative (MG)                                              | 649                       | 15,700                     |                         | Yes                  |                           |                            |            | 0.59          | 27,610          |              | 133,000                                     |         |        |
|                                              | L5          |                                                                              | 658                       | 4,100                      |                         | Yes                  |                           |                            |            | 0.32          | 16,362          |              | 103,000                                     |         |        |
|                                              | H6          |                                                                              | 656                       | 18,000                     |                         | Yes                  |                           |                            |            | 0.04          | 16,317          |              | 105,000                                     |         |        |
|                                              | dL5*        | MHN-ester                                                                    | 532                       | 3,000                      |                         | Yes                  |                           |                            |            | 11,12         | 9.00E-05        |              | 28,700                                      | Dimer   | 64,000 |
|                                              | DIR scFVs   | TO-PRO-5, TO-PRO-3, TO-PRO-1, YO-PRO-1, PO-PRO-1*                            | 450-750                   | 100                        |                         | Yes                  |                           |                            |            | 13            | 0.01-0.7        |              | 25,228 - 27,426                             | Monomer | n.d.   |

<sup>†</sup> CTPE, Chemogenetic Tag with Probe Exchange; Y-FAST, Yellow Fluorescence-Activating and absorption-Shifting Tag (Y-FAST); DFHBI, 3,5-difluoro-4-hydroxybenzylidene imidazolinone; HBR, 4-hydroxybenzylidene-rhodanine; HMBR, 4-hydroxy-3-methylbenzylidene-rhodanine; n.d., not determined; HBR-3,5-DOM, 4-hydroxy-3,5-dimethoxybenzylidene rhodamine; HBR-DOM2, (Z)-5-(4-hydroxy-2,5-dimethoxybenzylidene)-2-thioxothiazolidin-4-one.

**Table S2. Strains used in the study**

| Strain/type                                                   | Genotype                                                                                                                                | Reference  |
|---------------------------------------------------------------|-----------------------------------------------------------------------------------------------------------------------------------------|------------|
| <b><i>Escherichia coli</i></b>                                |                                                                                                                                         |            |
| BL21(DE3)                                                     | <i>fhuA2 [lon] ompT gal (λ DE3) [dcm] ΔhsdS</i><br>λ DE3 = λ <i>sBamHlo ΔEcoRI-B int::(lacI::PlacUV5::T7 gene1)</i><br><i>i21 Δnin5</i> | 14         |
| BW25113                                                       | Δ( <i>araD-araB</i> )567 Δ( <i>rhaD-rhaB</i> )568 Δ <i>lacZ</i> 4787 (::rrnB-3)<br><i>hsdR</i> 514 <i>rph-1</i>                         | 15         |
| <b><i>Lactococcus lactis</i></b>                              |                                                                                                                                         |            |
| NZ9000                                                        | MG1363; <i>pepN::nisR/K</i>                                                                                                             | 16         |
| NZ9000 Δ <i>ImrR</i>                                          | MG1363; <i>pepN::nisR/K</i> ; Δ <i>ImrR</i>                                                                                             | 16         |
| NZ9000 Δ <i>ImrR</i><br><i>pNSC8048-ImrR</i>                  | NZ9000 Δ <i>ImrR</i> harboring the plasmid <i>pNSC8048-ImrR</i>                                                                         | 16         |
| NZ9000 Δ <i>ImrR</i><br><i>pNZC3GH-ramR</i>                   | NZ9000 Δ <i>ImrR</i> harboring the plasmid <i>pNZC3GH-ramR</i>                                                                          | This study |
| <b><i>Saccharomyces cerevisiae</i></b>                        |                                                                                                                                         |            |
| BY4709                                                        | <i>MATα ura3Δ0</i>                                                                                                                      | 17         |
| SR80                                                          | BY4709 harboring the empty plasmid <i>pDD-ADH</i>                                                                                       | This study |
| SR80 Ade12- <i>LmrR</i>                                       | BY4709 harboring the plasmid <i>pDD-ADH-Ade12-ImrR</i>                                                                                  | This study |
| SR80 Ade12- <i>RamR</i>                                       | BY4709 harboring the plasmid <i>pDD-ADH-Ade12-ramR</i>                                                                                  | This study |
| <b><i>Primary human embryonic kidney cells (HEK-293T)</i></b> |                                                                                                                                         |            |
| WT                                                            | Untransfected Wild-type HEK cells                                                                                                       |            |
| WT <i>RamR</i>                                                | WT cells harboring the plasmid <i>pcDNA3.1-Cox8A-RamR-FLAG</i>                                                                          | This study |

**Table S3. Plasmids used in the study**

| Plasmid name             | Protein                                                                                          | Promoter | Affinity tag        | Inducer      | Sub-cellular location               | Organism                                        |
|--------------------------|--------------------------------------------------------------------------------------------------|----------|---------------------|--------------|-------------------------------------|-------------------------------------------------|
| pET17b-ramR              | Cytoplasmic RamR                                                                                 | T7       | Strep-Tag           | IPTG         | cytoplasm                           | <i>Escherichia coli</i> BL21 (DE3)              |
| pET17b-lmrR              | Cytoplasmic LmrR                                                                                 | T7       | Strep-Tag           | IPTG         | cytoplasm                           | <i>Escherichia coli</i> BL21 (DE3)              |
| pBAD-cyto-ramR           | Cytoplasmic RamR                                                                                 | araBAD   | His6-Tag            | arabinose    | cytoplasm                           | <i>Escherichia coli</i>                         |
| pBAD-cyto-lmrR           | Cytoplasmic LmrR                                                                                 | araBAD   | His6-Tag            | arabinose    | cytoplasm                           | <i>Escherichia coli</i>                         |
| pBAD-osmY-ramR           | Osmotically inducible protein Y fused to RamR in the C-terminus                                  | araBAD   | -                   | arabinose    | periplasm                           | <i>Escherichia coli</i>                         |
| pBAD-osmY-lmrR           | Osmotically inducible protein Y fused to LmrR in the C-terminus                                  | araBAD   | His6-Tag; Strep-Tag | arabinose    | periplasm                           | <i>Escherichia coli</i>                         |
| pNM077-ramR-pbP5         | Penicillin-binding protein 5 fused to RamR in the N-terminus                                     | ptrcdown | -                   | IPTG         | inner membrane facing the periplasm | <i>Escherichia coli</i>                         |
| pNM077-lmrR-pbP5         | Penicillin-binding protein 5 fused to LmrR in the N-terminus                                     | ptrcdown | -                   | IPTG         | inner membrane facing the periplasm | <i>Escherichia coli</i>                         |
| -                        | Control strain                                                                                   | -        | -                   | -            | -                                   | <i>Lactococcus lactis</i> pNZ9000 $\Delta$ lmrR |
| pNSC8048-lmrR            | Cytoplasmic LmrR                                                                                 | PnisA    | -                   | nisin A      | cytoplasm                           | <i>Lactococcus lactis</i> pNZ9000               |
| pNZC3GH-ramR             | Cytoplasmic RamR                                                                                 | PnisA    | -                   | nisin A      | cytoplasm                           | <i>Lactococcus lactis</i> pNZ9000 $\Delta$ lmrR |
| pDD-ADH                  | Prsii426: 2 $\mu$ empty plasmid (multicopy) with URA3 marker, no protein expressed <sup>18</sup> | ADH1     | His6-Tag            | constitutive | cytoplasm                           | <i>Saccharomyces cerevisiae</i> BY4709          |
| pDD-ADH-ade12-lmrR       | Cytoplasmic adenylosuccinate synthase fused to LmrR in the C-terminus                            | ADH1     | His6-Tag            | constitutive | cytoplasm                           | <i>Saccharomyces cerevisiae</i> BY4709          |
| pDD-ADH-ade12-ramR       | Cytoplasmic adenylosuccinate synthase fused to RamR in the C-terminus                            | ADH1     | His6-Tag            | constitutive | cytoplasm                           | <i>Saccharomyces cerevisiae</i> BY4709          |
| pcDNA3.1-Cox8A-RamR-FLAG | Codon optimized RamR with a mitochondrial targeting signal (Cox8A)                               | CMV      | FLAG-Tag            | constitutive | Inner mitochondrial membrane        | HEK-293T from primary embryonic human kidney    |

## Appendix 1: DNA sequences (5' to 3') of constructs used in the study

### RamR (native)

ATGGTGGCGCGTCCGAAGAGCGAGGACAAGAAACAAGCGCTGCTGGAAGCGGCGACCCAG  
GCGATTGCGCAAAGCGGTATTGCGGCGAGCACCGCGGTGATTGCGCGTAACGCGGGTGTT  
GCGGAGGGTACCCTGTTCCGTTACTTTGCGACCAAGGACGAACTGATTAACACCCTGTATCT  
GCACCTGAAACAGGATCTGAGCCAAAGCATGATCATGGAGCTGGACCGTAGCATTACCGAT  
GCGAAAATGATGACCCGTTTTCATCTGGAACAGCTACATTAGCTGGGGCCTGAACCATCCGG  
CGCGTACCGTGCGATCCGTCAGCTGGCGGTTAGCGAGAAGCTGACCAAAGAAACCGAAC  
AACGTGCGGACGATATGTTCCCGAACTGCGTGATCTGAGCCACCGTAGCGTGCTGATGGT  
TTTTATGAGCGACGAGTACCGTGCGTTCGGTGATGGCCTGTTTCTGGCGCTGGCGGAAACC  
ACCATGGATTTTTCGGCGCGTGATCCGGCGCGTGCGGGCGAGTATATTGCGCTGGGCTTT  
GAAGCGATGTGGCGTGCGCTGACCCGTGAGGAACAGGCGGCGTGAGGCCACCCGCAATTT  
GAAAAGTAA

### RamR (codon-optimized for *L. lactis*)

ATGGGTGGCATGGTGGCGCGTCCGAAGAGCGAGGATAAGAAACAAGCTCTACTTGAAGCTG  
CTACACAAGCCATTGCGCAAAGTGGGATTGCCGCATCGACAGCTGTAATTGCTAGAAATGCC  
GGTGTTCAGAAAGGTACCCTTTTCAGATATTTTCTACCAAAGACGAATTAATTAATACTG  
TATTTGCACTTGAAACAAGATTTATCACAACTATGATTATGGAATTGGACCGTTCAATTACCG  
ATGCGAAAATGATGACAAGATTCATATGGAATTCATACATTAGCTGGGGACTTAACCATCCAG  
CACGTCATCGTGCAATCCGTCAGCTTGCTGTTTCTGAGAAATTAACAAAAGAAACAGAACAA  
CGTGCTGACGATATGTTTCCAGAACTACGTGATTTATCACATCGTTCAGTCCTTATGGTTTTT  
ATGAGTGACGAGTATCGTGCAATTCGGAGATGGATTATTTCTGGCACTAGCTGAAACTACTAT  
GGATTTTCTGCGCGTGATCCCGCGCGTGACAGGAGAGTATATTGCTCTTGGCTTTGAAGCT  
ATGTGGCGTGCTTTAACTCGTGAGGAACAGGCGGCGTAA

### LmrR(K55D/K59Q)

ATGGGTGCCGAAATCCCGAAAGAAATGCTGCGTGCTCAAACCAATGTCATCCTGCTGAATGT  
CCTGAAACAAGGCGATAACTATGTGTATGGCATTATCAAACAGGTGAAAGAAGCGAGCAACG  
GTGAAATGGAAGTGAATGAAGCCACCCTGTATACGATTTTGGATCGTCTGGAACAGGACGGC  
ATTATCAGCTCTTACTGGGGTGATGAAAGTCAAGGCGGTCTGCGCAATATTACCGTCTGAC  
CGAAATCGGCCATGAAAACATGCGCCTGGCGTTCGAATCCTGGAGTCGTGTGGACAAAATC  
ATTGAAAATCTGGAAGCAAACAAAAATCTGAAGCGATCAAAGCCGCCTGGAGCCACCCGC  
AGTTCGAAAAACATCATCATCATCAT<sup>His6-Tag</sup>TGA



### OsmY-RamR

ATGACTATGACAAGACTGAAGATTTTCGAAAACCTGCTGGCTGTAATGTTGACCTCTGCCGT  
CGCGACCGGCTCTGCCTACGCGGAAAACAACGCGCAGACTACCAATGAAAGCGCAGGGCA  
AAAAGTCGATAGCTCTATGAATAAAGTCGGTAATTTTCATGGATGACAGCGCCATCACCGCGA  
AAGTGAAGGCGGCCCTGGTGGATCATGACAACATCAAGAGCACCGATATCTCTGTAAAAAC  
CGATCAAAAAGTCGTGACCCTGAGCGGTTTTCGTTGAAAGCCAGGCCCAGGCCGAAGAGGCA  
GTGAAAGTGCGGAAAAGGCGTTGAAGGGGTGACCTCTGTCAGCGACAAACTGCACGTTTCGC  
GACGCTAAAGAAGGCTCGGTGAAGGGCTACGCGGGTACACCGCCACCACCAGTCAAATC  
AAAGCCAAACTGCTGGCGGACGATATCGTCCCTTCCCGTCATGTGAAAGTTGAAACCACCG  
ACGGCGTGGTTCAGCTCTCCGGTACCGTCGATTCTCAGGCACAAAGTGACCGTGCTGAAAG  
TATCGCCAAAGCGGTAGATGGTGTGAAAAGCGTAAAAATGATCTGAAAACCTAAGGGCGGTG  
GCATGGTGGCGCGTCCGAAGAGCGAGGACAAGAAACAAGCGCTGCTGGAAGCGGCGACCC  
AGGCGATTGCGCAAAGCGGTATTGCGGCGAGCACCGCGGTGATTGCGCGTAACCGGGTG  
TTGCGGAGGGTACCCTGTTCCGTTACTTTGCGACCAAGGACGAACTGATTAACACCCTGTAT  
CTGCACCTGAAACAGGATCTGAGCCAAAGCATGATCATGGAGCTGGACCGTAGCATTACCG  
ATGCGAAAATGATGACCCGTTTTTCATCTGGAACAGCTACATTAGCTGGGGCCTGAACCATCCG  
GCGCGTCACCGTGCGATCCGTGAGCTGGCGGTTAGCGAGAAGCTGACCAAAGAAACCGAA  
CAACGTGCGGACGATATGTTCCCGGAACTGCGTGATCTGAGCCACCGTAGCGTGCTGATGG  
TTTTTATGAGCGACGAGTACCGTGCCTTCGGTGTGTCCTGTTTCTGGCGCTGGCGGAAAC  
CACCATGGATTTTGGCGCGCTGATCCGGCGCGTGGCGGAGTATATTGGCTGGGCTTT  
GAAGCGATGTGGCGTGCCTGACCCGTGAGGAACAGGCGGCGTGA

### OsmY-LmrR

ATGACTATGACAAGACTGAAGATTTTCGAAAACCTGCTGGCTGTAATGTTGACCTCTGCCGT  
CGCGACCGGCTCTGCCTACGCGGAAAACAACGCGCAGACTACCAATGAAAGCGCAGGGCA  
AAAAGTCGATAGCTCTATGAATAAAGTCGGTAATTTTCATGGATGACAGCGCCATCACCGCGA  
AAGTGAAGGCGGCCCTGGTGGATCATGACAACATCAAGAGCACCGATATCTCTGTAAAAAC  
CGATCAAAAAGTCGTGACCCTGAGCGGTTTTCGTTGAAAGCCAGGCCCAGGCCGAAGAGGCA  
GTGAAAGTGCGGAAAAGGCGTTGAAGGGGTGACCTCTGTCAGCGACAAACTGCACGTTTCGC  
GACGCTAAAGAAGGCTCGGTGAAGGGCTACGCGGGTACACCGCCACCACCAGTCAAATC  
AAAGCCAAACTGCTGGCGGACGATATCGTCCCTTCCCGTCATGTGAAAGTTGAAACCACCG  
ACGGCGTGGTTCAGCTCTCCGGTACCGTCGATTCTCAGGCACAAAGTGACCGTGCTGAAAG  
TATCGCCAAAGCGGTAGATGGTGTGAAAAGCGTAAAAATGATCTGAAAACCTAAGGGCGGTG  
GCATGGGTGCCGAAATCCCGAAAGAAATGCTGCGTGCTCAAACCAATGTCATCCTGCTGAAT  
GTCCTGAAACAAGGCGATAACTATGTGTATGGCATTATCAAACAGGTGAAAGAAGCGAGCAA  
CGGTGAAATGGAAGTGAATGAAGCCACCCTGTATACGATTTTTGATCGTCTGGAACAGGACG  
GCATTATCAGCTCTTACTGGGGTGTGAAAGTCAAGGCGGTGTCGCAATATTACCGTCTG  
ACCGAAATCGGCCATGAAAACATGCGCCTGGCGTTGGAATCCTGGAGTCGTGTGGACAAA  
TCATTGAAAATCTGGAAGCAAACAAAAATCTGAAGCGATCAAAGCCGCTGGAGCCACCG  
CAGTTCGAAAAA**CATCATCATCATCAT**<sup>His6-Tag</sup>TGA

**RamR-PBP5 with DsbA signal peptide**

ATGGGCAAAAAGATTTGGCTGGCGCTGGCTGGTTTTAGTTTTAGCGTTTAGCGCATCGGCGG  
CGCAGTATGAAGATCTCGAGGGTCCGGCTGGTCTGATGGTGGCGCGTCCGAAGAGCGAGG  
ACAAGAAACAAGCGCTGCTGGAAGCGGCGACCCAGGCGATTGCGCAAAGCGGTATTGCGG  
CGAGCACCGCGGTGATTGCGCGTAACGCGGGTGTTCGGAGGGTACCCTGTTCCGTTACTT  
TGGACCAAGGACGAACTGATTAACACCCTGTATCTGCACCTGAAACAGGATCTGAGCCAAA  
GCATGATCATGGAGCTGGACCGTAGCATTACCGATGCGAAAATGATGACCCGTTTCATCTGG  
AACAGCTACATTAGCTGGGGCCTGAACCATCCGGCGCGTCACCGTGCGATCCGTCAGCTGG  
CGTTAGCGAGAAGCTGACCAAAGAAACCGAACAACGTGCGGACGATATGTTCCCGGAACT  
GCGTGATCTGAGCCACCGTAGCGTGCTGATGGTTTTTATGAGCGACGAGTACCGTGCGTTC  
GGTGATGGCCTGTTTCTGGCGCTGGCGGAAACCACCATGGATTTTTCGGCGCGTGATCCG  
GCGCGTGCGGGCGAGTATATTGCGCTGGGCTTTGAAGCGATGTGGCGTGCGCTGACCCGT  
GAGGAACAGGCGGCGCATCATCATTCCGATGACCTGAATATCAAACTATGATCCCGGGTG  
TACCGCAGATCGATGCGGAGTCCTACATCCTGATTGACTATAACTCCGGCAAAGTGCTCGCC  
GAACAGAACGCAGATGTCCGCCGCGATCCTGCCAGCCTGACCAAATGATGACCAGTTACG  
TTATCGGCCAGGCAATGAAAGCCGGTAAATTTAAAGAACTGATTTAGTCACTATCGGCAAC  
GACGCATGGGCCACCGGTAACCCGGTGTAAAGGTTCTTCGCTGATGTTCCCTCAAACCGG  
GCATGCAGGTTCCGTTTTCTCAGCTGATCCGCGGTATTAACCTGCAATCGGGTAACGATGCT  
TGTGTCGCCATGGCCGATTTTGCCGCTGGTAGCCAGGACGCTTTTGTGGCTTGATGAACA  
GCTACGTTAACGCACTGGGCCTGAAAAATACCCACTTCCAGACGGTACATGGTCTGGATGCT  
GATGGTCAGTACAGCTCCGCGCGAGATATGGCGCTGATCGGCCAGGCATTGATCCGTGAC  
GTACCGAATGAATACTCGATCTATAAAGAAAAAGAATTTACGTTTAAACGGTATTCGCCAGCTG  
AACCGTAACGGCCTGTTATGGGATAACAGCCTGAATGTGACGGCATCAAAACCGGACACA  
CTGACAAAGCAGGTTACAACCTTGTTGCTTCTGCGACTGAAGGCCAGATGCGCTTGATTTCT  
GCGGTAATGGGCGGACGTACTTTTAAAGCCGTGAAGCCGAAAGTAAAAACTGCTAACCT  
GGGGCTTCCGTTTCTTTGAAACCGTTAACCCACTGAAAGTAGGTAAGAGTTTCGCCTCTGAA  
CCGTTTTGGTTTGGTGATTCTGATCGCGCTTCGTTAGGGGTTGATAAAGACGTGTACCTGAC  
CATTCCGCGTGGTCGCATGAAAGATCTGAAAGCCAGCTATGTGCTGAACAGCAGTGAATTG  
CATGCGCCGCTGAAAAGAATCAGGTCGTCGGAACATCAACTTCCAGCTTGATGGCAAAAC  
GATCGAGCAACGCCCGCTGGTTGTGTTGCAAGAAATCCCGGAAGGTAACCTTCTTCGGCAA  
ATCATTGATTACATTAATTAATGTTCCATCACTGGTTTTGGTTAA

**LmrR-PBP5 with DsbA signal peptide**

ATGGGC AAAAAGATTTGGCTGGCGCTGGCTGGTTTAGTTTTAGCGTTTAGCGCATCGGCGG  
CGCAGTATGAAGATCTCGAGGGTCCGGCTGGTCTGATGGGTGCCGAAATCCCGAAAGAAAT  
GCTGCGTGCTCAAACCAATGTCATCCTGCTGAATGTCCTGAAACAAGGCGATAACTATGTGT  
ATGGCATTATCAAACAGGTGAAAGAAGCGAGCAACGGTGAAATGGAAGTGAATGAAGCCAC  
CCTGTATACGATTTTTGATCGTCTGGAACAGGACGGCATTATCAGCTCTTACTGGGGTGATG  
AAAGTCAAGGCGGTCGTCGCAATATTACCGTCTGACCGAAATCGGCCATGAAAACATGCG  
CCTGGCGTTCGAATCCTGGAGTCGTGTGGACAAAATCATTGAAAATCTGGAAGCAAACAAA  
AATCTGAAGCGATCAAAGCCGCCTGGAGCCACCCGCAGTTCGAAAAACATCATCATTCCGAT  
GACCTGAATATCAAACATATGATCCCGGGTGTACCGCAGATCGATGCGGAGTCCTACATCCT  
GATTGACTATAACTCCGGCAAAGTGCTCGCCGAACAGAACGCAGATGTCCGCCGCGATCCT  
GCCAGCCTGACCAAAATGATGACCAGTTACGTTATCGGCCAGGCAATGAAAGCCGGTAAATT  
TAAAGAACTGATTTAGTCACTATCGGCAACGACGCATGGGCCACCGGTAACCCGGTGTTTA  
AAGGTTCTTCGCTGATGTTCCCTCAAACCGGGCATGCAGGTTCCGGTTTCTCAGCTGATCCGC  
GGTATTAACCTGCAATCGGGTAACGATGCTTGTGTCGCCATGGCCGATTTTGCCGCTGGTA  
GCCAGGACGCTTTTTGTTGGCTTGATGAACAGCTACGTTAACGCACTGGGCCTGAAAAATACC  
CACTTCCAGACGGTACATGGTCTGGATGCTGATGGTCAGTACAGCTCCGCGCGAGATATGG  
CGCTGATCGGCCAGGCATTGATCCGTGACGTACCGAATGAATACTCGATCTATAAAGAAAA  
GAATTTACGTTTAAACGGTATTCGCCAGCTGAACCGTAACGGCCTGTTATGGGATAACAGCCT  
GAATGTCGACGGCATCAAACCGGACACACTGACAAAGCAGGTTACAACCTTGTTGCTTCTG  
CGACTGAAGGCCAGATGCGCTTGATTTCTGCGGTAATGGGCGGACGTACTTTTAAAGGCCG  
TGAAGCCGAAAGTAAAAAACTGCTAACCTGGGGCTTCCGTTTCTTTGAAACCGTTAACCCAC  
TGAAAGTAGGTAAAGAGTTCGCCTCTGAACCGGTTTGGTTTGGTGATTCTGATCGCGCTTCG  
TTAGGGGTTGATAAAGACGTGTACCTGACCATTCCGCGTGGTCGCATGAAAGATCTGAAAGC  
CAGCTATGTGCTGAACAGCAGTGAATTGCATGCGCCGCTGCAAAGAATCAGGTCGTCGGA  
ACTATCAACTTCCAGCTTGATGGCAAACGATCGAGCAACGCCCGCTGGTTGTGTTGCAAGA  
AATCCCGGAAGGTAACCTTCTTCGGCAAATCATTGATTACATTAATTAATGTTCCATCACTG  
GTTTGGTTAA

**Ade12-RamR-6His**

ATGGTTAACGTTGTATTGGGCTCCCAATGGGGTGATGAGGGTAAAGGTAAACTAGTTGATTT  
ACTGGTTGGTAAATATGATATTGTAGCCCGTTGCGCCGGTGGTAACAATGCCGGGCATACCA  
TTGTTGTAGACGGTGTTAAGTATGATTTCCATATGTTACCATCTGGTTTAGTCAACCCAACT  
GCCAAAACCTTTTGGGTAATGGTGTTGTTATTCATGTTCCATCTTTTTTCAAAGAGTTGGAAA  
CCTTGGAAGCTAAAGTTTTGAAGAACGCAAGGAGTAGATTATTTGTTTCTTCCAGAGCACATT  
TAGTCTTTGACTTTTCATCAGGTGACTGACAAGCTAAGAGAATTGGAGTTATCAGGTGTTCTA  
AAGATGGTAAAAATATCGGTACTACCGGTAAAGGTATTGGTCCAACCTTATTCCACAAAGGCTT  
CTAGATCTGGTTTGAGAGTTCATCATTGGGTGAATGATCAACCCGGTGCCTGGGAGGAATTT  
GTTGCTAGATATAAGAGATTATTGGAAACGAGAAGACAAAAGATACGGTGATTTCGAATACGA  
CTTTGAAGCCAAGCTTGCTGAATACAAGAAGTTAAGAGAGCAACTAAAGCCATTCGTCGTCG  
ATTCTGTCGTTTTTCATGCACAATGCTATTGAAGCAAAGAAAAAGATATTGGTTGAGGGTGCTA  
ATGCTTTGATGTTGGATATTGATTTTGGTACTTATCCATATGTGACTTCTTCCAATACTGGTAT  
TGGTGGTGCCTCACCGGTTAGGTATTCCTCCACGTAATGATGAAATTTATGGTGTGTTGT  
TAAAGCCTACACAAGTAGAGTTGGTGAAGGTCCTTTCCCAACGGAACAATTGAACGAAAATG  
GAGAAAACTGCAGACCATTGGTGCTGAATTTGGTGTCACTACTGGTCGTAAGCGTCGTTGC  
GGTTGGTTAGACTTGGTAGTCTTGAATACTCAACTTTGATCAATGGATACACGAGTTTGAAC  
ATTACCAAGTTAGACGTCCTCGATACTTTCAAAGAAATCCCAGTGGGTATTTTCATATTCTATT  
CAAGGTAAGAAGCTAGATTTGTTCCCTGAAGACTTGAATATTCTTGGTAAAGTTGAAGTTGAA  
TACAAAGTTTTGCCAGGTTGGGATCAAGATATTACCAAAATTACAAAGTATGAAGATTGCCG  
GAAAACGCAAAGAAGTACTTAAAATATATTGAAGATTTTGTGGCGTTCCCTGTTGAATGGGTT  
GGTACCGGCCCCGCAAGAGAAAGCATGTTGCATAAAGAAATTAATAATGGTGGCGCGTCCGA  
AGAGCGAGGACAAGAACAAGCGCTGCTGGAAGCGGCGACCCAGGCGATTGCGCAAAGCG  
GTATTGCGGCGAGCACCGCGGTGATTGCGCGTAACGCGGGTGTGCGGAGGGTACCCTGT  
TCCGTTACTTTGCGACCAAGGACGAAGTATTAACACCCTGTATCTGCACCTGAAACAGGAT  
CTGAGCCAAAGCATGATCATGGAGCTGGACCGTAGCATTACCGATGCGAAAATGATGACCC  
GTTTCATCTGGAACAGCTACATTAGCTGGGGCCTGAACCATCCGGCGCGTCACCGTGCGAT  
CCGTCAGCTGGCGGTTAGCGAGAAGCTGACCAAAGAAACCGAACAACGTGCGGACGATATG  
TTCCCGAACTGCGTGATCTGAGCCACCGTAGCGTGCTGATGGTTTTTATGAGCGACGAGT  
ACCGTGCGTTCGGTATGGCCTGTTTCTGGCGCTGGCGGAAACCACCATGGATTTTTCGGC  
GCGTGATCCGGCGCGTGCGGGCGAGTATATTGCGCTGGGCTTTGAAGCGATGTGGCGTGC  
GCTGACCCGTGAGGAACAGGCGGCGCATCATCATCATCAT<sup>His6-Tag</sup>TA

**Ade12-LmrR-6His**

ATGGTTAACGTTGTATTGGGCTCCCAATGGGGTGATGAGGGTAAAGGTAAACTAGTTGATTT  
ACTGGTTGGTAAATATGATATTGTAGCCCGTTGCGCCGGTGGTAACAATGCCGGGCATACCA  
TTGTTGTAGACGGTGTAAAGTATGATTTCCATATGTTACCATCTGGTTTAGTCAACCCAACT  
GCCAAAACCTTTTGGGTAATGGTGTGTTATTTCATGTTCCATCTTTTTTCAAAGAGTTGGAAA  
CCTTGAAGCTAAAGTTTTGAAGAACGCAAGGAGTAGATTATTTGTTTTCTCCAGAGCACATT  
TAGTCTTTGACTTTTCATCAGGTGACTGACAAGCTAAGAGAATTGGAGTTATCAGGTGTTCTA  
AAGATGGTAAAAATATCGGTACTACCGGTAAAGGTATTGGTCCAACCTTATTCCACAAAGGCTT  
CTAGATCTGGTTTGAGAGTTCATCATTGGTGAATGATCAACCCGGTGCCTGGGAGGAATTT  
GTTGCTAGATATAAGAGATTATTGGAAACGAGAAGACAAAGATACGGTGATTTTGAATACGA  
CTTTGAAGCCAAGCTTGCTGAATACAAGAAGTTAAGAGAGCAACTAAAGCCATTCGTCGTCG  
ATTCTGTCGTTTTTCATGCACAATGCTATTGAAGCAAAGAAAAAGATATTGGTTGAGGGTGCTA  
ATGCTTTGATGTTGGATATTGATTTTGGTACTTATCCATATGTGACTTCTCCAATACTGGTAT  
TGGTGGTGCCTCACCGGTTAGGTATTCCTCCACGTAATGATGAAATTTATGGTGTGTTGT  
TAAAGCCTACACAACCTAGAGTTGGTGAAGGTCCTTTCCCAACGGAACAATTGAACGAAAATG  
GAGAAAACTGCAGACCATTGGTGTGTAATTTGGTGTCACTACTGGTCGTAAGCGTCGTTGC  
GGTTGGTTAGACTTGGTAGTCTTGAATACTCAACTTTGATCAATGGATACACGAGTTTGAAC  
ATTACCAAGTTAGACGTCCTCGATACTTTCAAAGAAATCCCAGTGGGTATTTTCATATTCTATT  
CAAGGTAAGAAGCTAGATTTGTTCCCTGAAGACTTGAATATTCTTGGTAAAGTTGAAGTTGAA  
TACAAAGTTTTGCCAGGTTGGGATCAAGATATTACCAAAATTACAAAGTATGAAGATTGGCCG  
GAAAACGCAAAGAAGTACTTAAAATATATTGAAGATTTTGTGGCGTTCCCTGTTGAATGGGTT  
GGTACCGGCCCCGCAAGAGAAAGCATGTTGCATAAAGAAATTAATGGGTGCCGAAATCC  
CGAAAGAAATGCTGCGTGCTCAAACCAATGTCATCTGCTGAATGTCCTGAAACAAGGCGAT  
AACTATGTGTATGGCATTATCAAACAGGTGAAAGAAGCGAGCAACGGTGAATGGAAGTAA  
TGAAGCCACCCTGTATACGATTTTTGATCGTCTGGAACAGGACGGCATTATCAGCTCTTACT  
GGGGTGATGAAAGTCAAGGCGGTCGTCGCAAATATTACCGTCTGACCGAAATCGGCCATGA  
AAACATGCGCCTGGCGTTTGAATCCTGGAGTCGTGTGGACAAAATCATTGAAAATCTGGAAG  
CAAACAAAAAATCTGAAGCGATCAAAGCCCATCATCATCATCATCAT<sup>His6-Tag</sup>TAA

**Cox8A RamR<sup>FLAG</sup> with HindII and EcoRI restriction sites (red)**

AAGCTTATGAGCGTGCTGACCCCCCTGCTGCTGCGCGGCCTGACCGGCAGCGCC  
CGCCGCTGCCCGTGCCCCGCGCCAAGATCCACAGCCTGATGGTGGCCCGCCCC  
AAGAGCGAGGACAAGAAGCAGGCCCTGCTGGAGGCCGCCACCCAGGCCATCGCC  
CAGAGCGGCATCGCCGCCAGCACCGCCGTGATCGCCCGCAACGCCGGCGTGGCC  
GAGGGCACCTGTTCCGTAATTCGCCACCAAGGACGAGCTGATCAACACCCTGT  
ACCTGCACCTGAAGCAGGACCTGAGCCAGAGCATGATCATGGAGCTGGACCGCAG  
CATCACCGACGCCAAGATGATGACCCGCTTCATCTGGAACAGCTACATCAGCTGGG  
GCCTGAACCACCCCGCCCGCCACCGCGCCATCCGCCAGCTGGCCGTGAGCGAGA  
AGCTGACCAAGGAGACCGAGCAGCGCGCCGACGACATGTTCCCCGAGCTGCGCG  
ACCTGAGCCACCGCAGCGTGCTGATGGTGTTCATGAGCGACGAGTACCGCGCCTT  
CGGCGACGGCCTGTTCCCTGGCCCTGGCCGAGACCACCATGGACTTCGCCGCCCCG  
CGACCCCGCCCGCGCCGGCGAGTACATCGCCCTGGGCTTCGAGGCCATGTGGCG  
CGCCCTGACCCGCGAGGAGCAGGCCGCTGGAGCCACCCCGACTACAAGGACGA  
CGACGACAAGTAGGAATTC

## Appendix 2. Gating strategy for flow cytometry studies

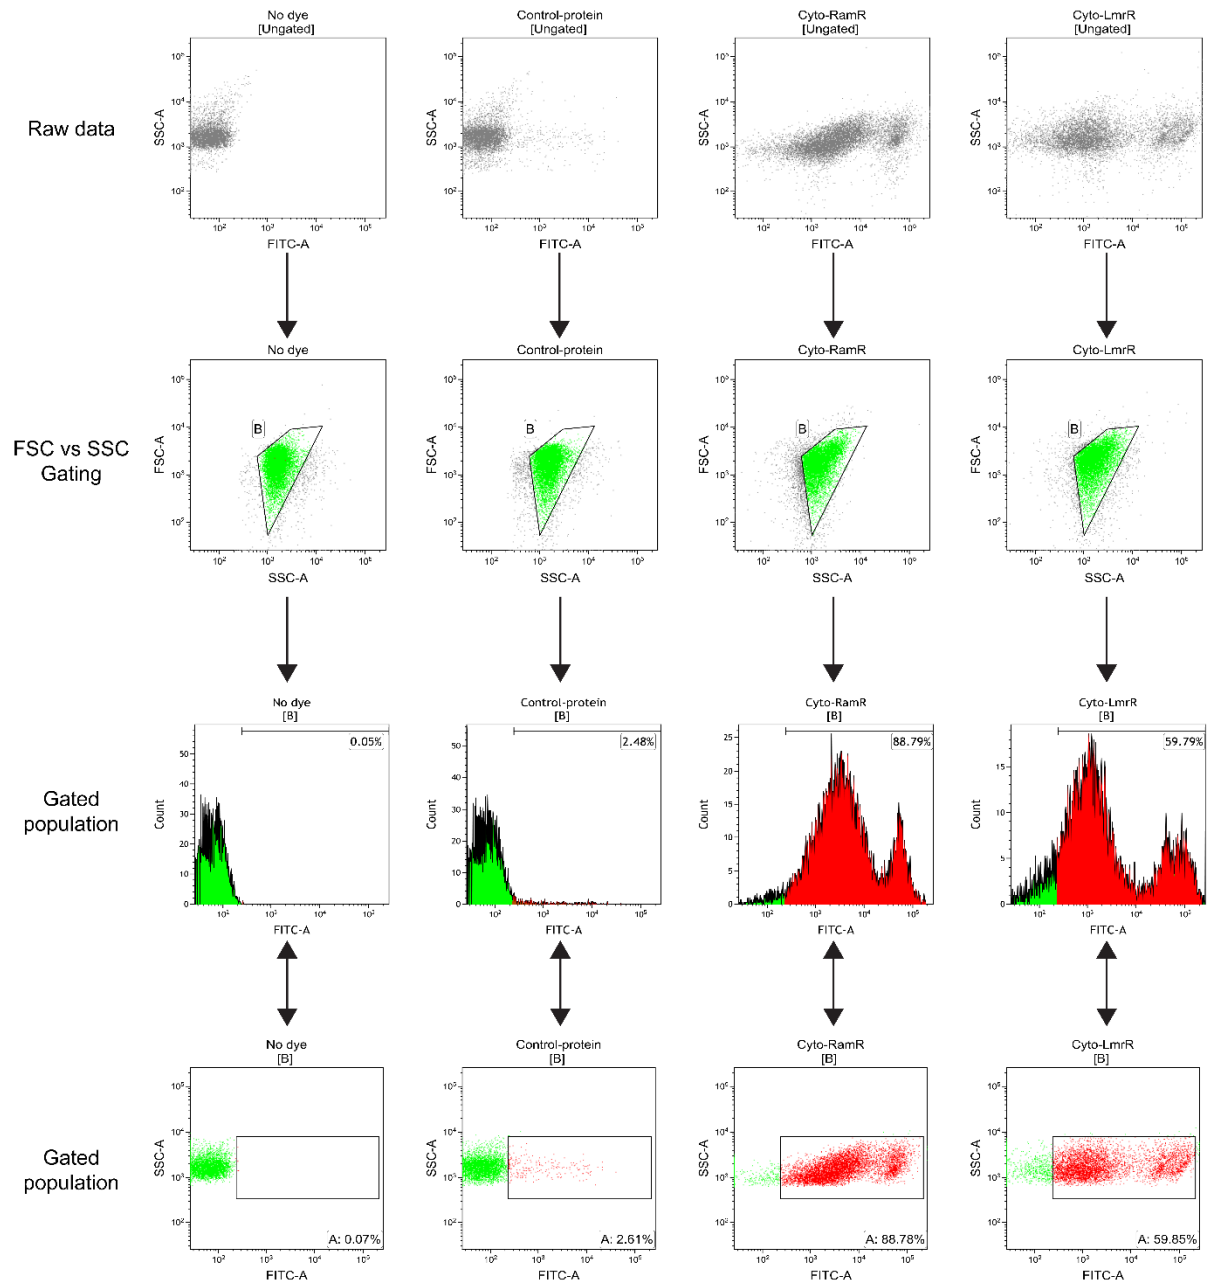

**Gating strategy:** For *E. coli*, *L. lactis*, and *S. cerevisiae* cells, firstly using the FSC/SSC gating, cell debris was removed from the main cell population. A positivity threshold gate for each sample was defined based on unlabeled (0%) and control cells expressing no or control protein yet labeled (< 3%). An identical positivity threshold gate was applied to all samples for a given organic dye. 10000 events were collected for each sample. For HEK293T cells, a starting cell population per sample was collected with the stopping rule of 30000 events per preliminary gate drawn in FSC/SSC. Next, the cells were analyzed, placing gates on PE population indicating FLAG expression labeled with Alexa Fluor 568. APC filter was used to detect Bodipy-625 fluorescence. Negative/high background populations were defined by unstained cells visible in PE channel and untransfected but Bodipy-625 pulsed cells in APC channel.

### Appendix 3. Sources and nomenclature of dyes

| Name             | Commercial Name             | CAS          | Pubchem CID | Source                        |
|------------------|-----------------------------|--------------|-------------|-------------------------------|
| DFHBI            | DFHBI                       | 1241390-29-3 | 70808995    | Sigma Aldrich/Merck           |
| Bodipy488        | BODIPY™ 493/503             | 121207-31-6  | 14766991    | ThermoFischer Scientific      |
| Bodipy495        | BODIPY dye                  | 194235-40-0  | 25058170    | Sigma Aldrich/Merck           |
| Rhodamine 6G     | Rhodamine 6G                | 989-38-8     | 13806       | Sigma Aldrich/Merck           |
| Rose Bengal      | Rose Bengal                 | 632-69-9     | 34343       | Sigma Aldrich/Merck           |
| Bodipy 589       | BDP TR carboxylic acid      | 150152-64-0  | 131954291   | Lumiprobe GmbH                |
| Bodipy 625       | BDP 630/650 carboxylic acid | 2183512-02-7 | 123784196   | BroadPharm/<br>Lumiprobe GmbH |
| Riboflavin       | Riboflavin                  | 83-88-5      | 493570      | Sigma Aldrich/Merck           |
| AlexaFluor488    | AlexaFluor489               | 500004-82-0  | 135627723   | ThermoFischer Scientific      |
| Bodipy FL COOH   | BDP FL carboxylic acid      | 165599-63-3  | 9817511     | Lumiprobe GmbH                |
| Eosin Y          | Eosin Y                     | 15086-94-9   | 27020       | Sigma Aldrich/Merck           |
| Bodipy R6G COOH  | BDP R6G carboxylic acid     | 174881-57-3  | 21982947    | Lumiprobe GmbH                |
| 6-TAMRA          | 6-TAMRA                     | 91809-67-5   | 2762604     | Sigma Aldrich/Merck           |
| Bodipy558        | BDP 558/568 carboxylic acid | 150173-72-1  | 131954294   | Lumiprobe GmbH                |
| AlexaFluor647    | AlexaFluor648               | 400051-23-2  | 102227060   | ThermoFischer Scientific      |
| Probe 6          | Probe 6                     | -            | -           | Wang et. al. 2020             |
| Probe 10         | Probe 10                    | -            | -           | Wang et. al. 2020             |
| Probe 11         | Probe 11                    | -            | -           | Wang et. al. 2020             |
| Probe 15         | Probe 15                    | -            | -           | Wang et. al. 2020             |
| Probe 22         | Probe 22                    | -            | -           | Wang et. al. 2020             |
| Probe 23         | Probe 23                    | -            | -           | Wang et. al. 2020             |
| Probe 29         | Probe 29                    | -            | -           | Wang et. al. 2020             |
| Probe 33         | Probe 33                    | -            | -           | Wang et. al. 2020             |
| Ethidium bromide | Ethidium bromide            | 1239-45-8    | 14710       | Sigma Aldrich/Merck           |
| Hoechst33342     | Hoechst33343                | 23491-52-3   | 1464        | ThermoFischer Scientific      |
| DPH              | DPH                         | 115534-33-3  | 5706757     | Sigma Aldrich/Merck           |
| NPN              | NPN                         | 90-30-2      | 7013        | Sigma Aldrich/Merck           |
| DAPI             | DAPI                        | 47165-04-8   | 2954        | Sigma Aldrich/Merck           |
| ANS              | ANS                         | 82-76-8      | 1369        | Sigma Aldrich/Merck           |
| Thioflavin T     | Thioflavin T                | 2390-54-7    | 16953       | Sigma Aldrich/Merck           |

## SI References

- (1) Ducret, A.; Quardokus, E. M.; Brun, Y. V. MicrobeJ, a Tool for High Throughput Bacterial Cell Detection and Quantitative Analysis. *Nat. Microbiol.* **2016**, *1* (7).
- (2) Stierand, K.; Rarey, M. Drawing the PDB: Protein-Ligand Complexes in Two Dimensions. *ACS Med. Chem. Lett.* **2010**, *1* (9), 540–545.
- (3) Rose, A. S.; Bradley, A. R.; Valasatava, Y.; Duarte, J. M.; Prlic, A.; Rose, P. W. NGL Viewer: Web-Based Molecular Graphics for Large Complexes. *Bioinformatics* **2018**, *34* (21), 3755–3758.
- (4) Plamont, M. A.; Billon-Denis, E.; Maurin, S.; Gauron, C.; Pimenta, F. M.; Specht, C. G.; Shi, J.; Quérard, J.; Pan, B.; Rossignol, J.; Morellet, N.; Volovitch, M.; Lescop, E.; Chen, Y.; Triller, A.; Vríz, S.; Le Saux, T.; Jullien, L.; Gautier, A. Small Fluorescence-Activating and Absorption-Shifting Tag for Tunable Protein Imaging in Vivo. *Proc. Natl. Acad. Sci. U. S. A.* **2016**.
- (5) Li, C.; Plamont, M. A.; Sladitschek, H. L.; Rodrigues, V.; Aujard, I.; Neveu, P.; Le Saux, T.; Jullien, L.; Gautier, A. Dynamic Multicolor Protein Labeling in Living Cells. *Chem. Sci.* **2017**.
- (6) Tebo, A. G.; Moeyaert, B.; Thauvin, M.; Carlon-Andres, I.; Böken, D.; Volovitch, M.; Padilla-Parra, S.; Dedecker, P.; Vríz, S.; Gautier, A. Orthogonal Fluorescent Chemogenetic Reporters for Multicolor Imaging. *Nat. Chem. Biol.* **2021**.
- (7) Mineev, K. S.; Goncharuk, S. A.; Goncharuk, M. V.; Povarova, N. V. NanoFAST : Structure-Based Design of a Small Fluorogen- Activating Protein with Only 98 Amino Acids. **2020**, 1–8.
- (8) Kumagai, A.; Ando, R.; Miyatake, H.; Greimel, P.; Kobayashi, T.; Hirabayashi, Y.; Shimogori, T.; Miyawaki, A. A Bilirubin-Inducible Fluorescent Protein from Eel Muscle. *Cell* **2013**, *153* (7), 1602–1611.
- (9) Szent-Gyorgyi, C.; Schmidt, B. A.; Creeger, Y.; Fisher, G. W.; Zakel, K. L.; Adler, S.; Fitzpatrick, J. A. J.; Woolford, C. A.; Yan, Q.; Vasilev, K. V.; Berget, P. B.; Bruchez, M. P.; Jarvik, J. W.; Waggoner, A. Fluorogen-Activating Single-Chain Antibodies for Imaging Cell Surface Proteins. *Nat. Biotechnol.* **2008**.
- (10) Fitzpatrick, J. A. J.; Yan, Q.; Sieber, J. J.; Dyba, M.; Schwarz, U.; Szent-Gyorgyi, C.; Woolford, C. A.; Berget, P. B.; Waggoner, A. S.; Bruchez, M. P. STED Nanoscopy in Living Cells Using Fluorogen Activating Proteins. *Bioconjug. Chem.* **2009**.
- (11) Szent-Gyorgyi, C.; Stanfield, R. L.; Andreko, S.; Dempsey, A.; Ahmed, M.; Capek, S.; Waggoner, A. S.; Wilson, I. A.; Bruchez, M. P. Malachite Green Mediates Homodimerization of Antibody VL Domains to Form a Fluorescent Ternary Complex with Singular Symmetric Interfaces. *J. Mol. Biol.* **2013**.
- (12) Saurabh, S.; Perez, A. M.; Commerci, C. J.; Shapiro, L.; Moerner, W. E. Super-Resolution Imaging of Live Bacteria Cells Using a Genetically Directed, Highly Photostable Fluoromodule. *J. Am. Chem. Soc.* **2016**.
- (13) Özhalici-Ünal, H.; Pow, C. L.; Marks, S. A.; Jesper, L. D.; Silva, G. L.; Shank, N. I.; Jones, E. W.; Burnette, J. M.; Berget, P. B.; Armitage, B. A. A Rainbow of Fluoromodules: A Promiscuous ScFv Protein Binds to and Activates a Diverse Set of Fluorogenic Cyanine Dyes. *J. Am. Chem. Soc.* **2008**.
- (14) Studier, F. W.; Moffatt, B. A. Use of Bacteriophage T7 RNA Polymerase to Direct Selective High-Level Expression of Cloned Genes. *J. Mol. Biol.* **1986**, *189* (1), 113–130.
- (15) Datsenko, K. A.; Wanner, B. L. One-Step Inactivation of Chromosomal Genes in *Escherichia Coli* K-12 Using PCR Products. *Proc. Natl. Acad. Sci. U. S. A.* **2000**, *97* (12), 6640–6645.
- (16) Agustindari, H.; Lubelski, J.; Van Den Berg Van Saparoea, H. B.; Kuipers, O. P.; Driessen, A. J. M. LmrR Is a Transcriptional Repressor of Expression of the Multidrug ABC Transporter LmrCD in *Lactococcus Lactis*. *J. Bacteriol.* **2008**, *190* (2), 759–763.
- (17) Brachmann, C. B.; Davies, A.; Cost, G. J.; Caputo, E.; Li, J.; Hieter, P.; Boeke, J. D. Designer Deletion Strains Derived from *Saccharomyces Cerevisiae* S288C: A Useful Set of Strains and Plasmids for PCR-Mediated Gene Disruption and Other Applications. *Yeast* **1998**, *14* (2), 115–132.



- (18) Chee, M. K.; Haase, S. B. New and Redesigned PRS Plasmid Shuttle Vectors for Genetic Manipulation of *Saccharomyces Cerevisiae*. *G3 Genes, Genomes, Genet.* **2012**, 2 (5), 515–526.
